# Supplementary material for: Co-occurrence of beaked whale strandings and naval sonar in the Mariana Islands, Western Pacific
Source: Proc Biol Sci. 2020 Feb 19;287(1921):20200070. doi: 10.1098/rspb.2020.0070 (PMC7062028; doi:10.1098/rspb.2020.0070)
Supplement: MFAS Detection Times [file rspb20200070supp6.xlsx]

## Sheet: Sheet1
Start time	Recording Location
2011-08-21 02:03:31	West HARP
2011-08-21 02:04:12	West HARP
2011-08-21 02:04:53	West HARP
2011-08-21 02:20:14	West HARP
2011-08-21 02:20:32	West HARP
2011-08-21 02:20:44	West HARP
2011-08-21 02:21:00	West HARP
2011-08-21 02:21:15	West HARP
2011-08-21 02:21:36	West HARP
2011-08-21 02:21:47	West HARP
2011-08-21 02:21:52	West HARP
2011-08-21 02:22:19	West HARP
2011-08-21 02:22:27	West HARP
2011-08-21 02:22:37	West HARP
2011-08-21 02:22:41	West HARP
2011-08-21 02:23:02	West HARP
2011-08-21 02:23:18	West HARP
2011-08-21 02:23:30	West HARP
2011-08-21 02:23:38	West HARP
2011-08-21 02:23:59	West HARP
2011-08-21 02:24:10	West HARP
2011-08-21 02:24:19	West HARP
2011-08-21 02:24:28	West HARP
2011-08-21 02:24:40	West HARP
2011-08-21 02:24:57	West HARP
2011-08-21 02:40:11	West HARP
2011-08-21 02:40:26	West HARP
2011-08-21 02:40:28	West HARP
2011-08-21 02:40:28	West HARP
2011-08-21 02:40:35	West HARP
2011-08-21 02:40:47	West HARP
2011-08-21 02:41:07	West HARP
2011-08-21 02:41:20	West HARP
2011-08-21 02:41:22	West HARP
2011-08-21 02:41:36	West HARP
2011-08-21 02:41:48	West HARP
2011-08-21 02:41:57	West HARP
2011-08-21 02:42:11	West HARP
2011-08-21 02:42:16	West HARP
2011-08-21 02:42:26	West HARP
2011-08-21 02:42:29	West HARP
2011-08-21 02:42:48	West HARP
2011-08-21 02:43:03	West HARP
2011-08-21 02:43:10	West HARP
2011-08-21 02:43:10	West HARP
2011-08-21 02:43:17	West HARP
2011-08-21 02:43:38	West HARP
2011-08-21 02:43:51	West HARP
2011-08-21 02:43:55	West HARP
2011-08-21 02:44:04	West HARP
2011-08-21 02:44:05	West HARP
2011-08-21 02:44:29	West HARP
2011-08-21 02:44:32	West HARP
2011-08-21 02:44:46	West HARP
2011-08-21 02:44:55	West HARP
2011-08-21 02:44:58	West HARP
2011-08-21 03:00:14	West HARP
2011-08-21 03:00:28	West HARP
2011-08-21 03:00:36	West HARP
2011-08-21 03:00:38	West HARP
2011-08-21 03:00:56	West HARP
2011-08-21 03:01:06	West HARP
2011-08-21 03:01:19	West HARP
2011-08-21 03:01:26	West HARP
2011-08-21 03:01:33	West HARP
2011-08-21 03:01:58	West HARP
2011-08-21 03:02:09	West HARP
2011-08-21 03:02:15	West HARP
2011-08-21 03:02:18	West HARP
2011-08-21 03:02:27	West HARP
2011-08-21 03:02:49	West HARP
2011-08-21 03:02:59	West HARP
2011-08-21 03:03:00	West HARP
2011-08-21 03:03:05	West HARP
2011-08-21 03:03:22	West HARP
2011-08-21 03:03:40	West HARP
2011-08-21 03:03:41	West HARP
2011-08-21 03:03:51	West HARP
2011-08-21 03:03:54	West HARP
2011-08-21 03:04:17	West HARP
2011-08-21 03:04:32	West HARP
2011-08-21 03:04:41	West HARP
2011-08-21 03:04:44	West HARP
2011-08-21 03:20:05	West HARP
2011-08-21 03:20:26	West HARP
2011-08-21 03:20:39	West HARP
2011-08-21 03:20:56	West HARP
2011-08-21 03:20:56	West HARP
2011-08-21 03:20:58	West HARP
2011-08-21 03:21:17	West HARP
2011-08-21 03:21:30	West HARP
2011-08-21 03:21:48	West HARP
2011-08-21 03:21:48	West HARP
2011-08-21 03:22:07	West HARP
2011-08-21 03:22:21	West HARP
2011-08-21 03:22:40	West HARP
2011-08-21 03:22:40	West HARP
2011-08-21 03:22:55	West HARP
2011-08-21 03:23:11	West HARP
2011-08-21 03:23:33	West HARP
2011-08-21 03:23:32	West HARP
2011-08-21 03:24:01	West HARP
2011-08-21 03:24:24	West HARP
2011-08-21 03:24:25	West HARP
2011-08-21 03:24:52	West HARP
2011-08-21 03:40:18	West HARP
2011-08-21 03:40:31	West HARP
2011-08-21 03:41:10	West HARP
2011-08-21 03:41:21	West HARP
2011-08-21 03:42:01	West HARP
2011-08-21 03:42:11	West HARP
2011-08-21 03:42:53	West HARP
2011-08-21 03:43:01	West HARP
2011-08-21 03:43:34	West HARP
2011-08-21 03:43:51	West HARP
2011-08-21 03:44:26	West HARP
2011-08-21 03:44:41	West HARP
2011-08-21 04:00:08	West HARP
2011-08-21 04:00:34	West HARP
2011-08-21 04:00:46	West HARP
2011-08-21 04:01:24	West HARP
2011-08-21 04:01:37	West HARP
2011-08-21 04:02:14	West HARP
2011-08-21 04:02:29	West HARP
2011-08-21 04:03:04	West HARP
2011-08-21 04:03:20	West HARP
2011-08-21 04:03:54	West HARP
2011-08-21 04:04:12	West HARP
2011-08-21 04:04:38	West HARP
2011-08-21 04:04:44	West HARP
2011-08-21 04:20:27	West HARP
2011-08-21 04:20:32	West HARP
2011-08-21 04:20:33	West HARP
2011-08-21 04:21:17	West HARP
2011-08-21 04:21:22	West HARP
2011-08-21 04:21:24	West HARP
2011-08-21 04:22:07	West HARP
2011-08-21 04:22:12	West HARP
2011-08-21 04:22:16	West HARP
2011-08-21 04:22:56	West HARP
2011-08-21 04:23:02	West HARP
2011-08-21 04:23:07	West HARP
2011-08-21 04:23:12	West HARP
2011-08-21 04:23:45	West HARP
2011-08-21 04:23:52	West HARP
2011-08-21 04:23:59	West HARP
2011-08-21 04:24:34	West HARP
2011-08-21 04:24:42	West HARP
2011-08-21 04:24:50	West HARP
2011-08-21 04:40:03	West HARP
2011-08-21 04:40:17	West HARP
2011-08-21 04:40:35	West HARP
2011-08-21 04:40:53	West HARP
2011-08-21 04:41:09	West HARP
2011-08-21 04:41:25	West HARP
2011-08-21 04:41:42	West HARP
2011-08-21 04:42:00	West HARP
2011-08-21 04:42:15	West HARP
2011-08-21 04:42:31	West HARP
2011-08-21 04:42:52	West HARP
2011-08-21 04:43:05	West HARP
2011-08-21 04:43:20	West HARP
2011-08-21 04:43:43	West HARP
2011-08-21 04:43:55	West HARP
2011-08-21 04:44:09	West HARP
2011-08-21 04:44:34	West HARP
2011-08-21 04:44:45	West HARP
2011-08-21 04:44:59	West HARP
2011-08-21 05:00:01	West HARP
2011-08-21 05:00:13	West HARP
2011-08-21 05:00:16	West HARP
2011-08-21 05:00:34	West HARP
2011-08-21 05:00:53	West HARP
2011-08-21 05:01:05	West HARP
2011-08-21 05:01:05	West HARP
2011-08-21 05:01:24	West HARP
2011-08-21 05:01:45	West HARP
2011-08-21 05:01:54	West HARP
2011-08-21 05:01:56	West HARP
2011-08-21 05:02:14	West HARP
2011-08-21 05:02:36	West HARP
2011-08-21 05:02:42	West HARP
2011-08-21 05:02:47	West HARP
2011-08-21 05:03:04	West HARP
2011-08-21 05:03:28	West HARP
2011-08-21 05:03:31	West HARP
2011-08-21 05:03:38	West HARP
2011-08-21 05:03:54	West HARP
2011-08-21 05:04:19	West HARP
2011-08-21 05:04:20	West HARP
2011-08-21 05:04:30	West HARP
2011-08-21 05:04:44	West HARP
2011-08-21 05:20:38	West HARP
2011-08-21 05:20:40	West HARP
2011-08-21 05:20:44	West HARP
2011-08-21 05:21:29	West HARP
2011-08-21 05:21:29	West HARP
2011-08-21 05:21:35	West HARP
2011-08-21 05:22:12	West HARP
2011-08-21 05:22:18	West HARP
2011-08-21 05:22:21	West HARP
2011-08-21 05:22:26	West HARP
2011-08-21 05:22:53	West HARP
2011-08-21 05:23:07	West HARP
2011-08-21 05:23:12	West HARP
2011-08-21 05:23:18	West HARP
2011-08-21 05:23:34	West HARP
2011-08-21 05:23:56	West HARP
2011-08-21 05:24:04	West HARP
2011-08-21 05:24:09	West HARP
2011-08-21 05:24:15	West HARP
2011-08-21 05:24:44	West HARP
2011-08-21 05:24:55	West HARP
2011-08-21 05:24:56	West HARP
2011-08-21 05:40:14	West HARP
2011-08-21 05:40:26	West HARP
2011-08-21 05:40:27	West HARP
2011-08-21 05:40:33	West HARP
2011-08-21 05:41:03	West HARP
2011-08-21 05:41:14	West HARP
2011-08-21 05:41:16	West HARP
2011-08-21 05:41:18	West HARP
2011-08-21 05:41:19	West HARP
2011-08-21 05:41:52	West HARP
2011-08-21 05:41:54	West HARP
2011-08-21 05:42:06	West HARP
2011-08-21 05:42:10	West HARP
2011-08-21 05:42:11	West HARP
2011-08-21 05:42:35	West HARP
2011-08-21 05:42:41	West HARP
2011-08-21 05:42:56	West HARP
2011-08-21 05:43:01	West HARP
2011-08-21 05:43:02	West HARP
2011-08-21 05:43:16	West HARP
2011-08-21 05:43:31	West HARP
2011-08-21 05:43:46	West HARP
2011-08-21 05:43:53	West HARP
2011-08-21 05:43:54	West HARP
2011-08-21 05:43:57	West HARP
2011-08-21 05:44:20	West HARP
2011-08-21 05:44:36	West HARP
2011-08-21 05:44:37	West HARP
2011-08-21 05:44:45	West HARP
2011-08-21 05:44:46	West HARP
2011-08-21 06:00:16	West HARP
2011-08-21 06:00:24	West HARP
2011-08-21 06:00:26	West HARP
2011-08-21 06:00:27	West HARP
2011-08-21 06:00:46	West HARP
2011-08-21 06:01:05	West HARP
2011-08-21 06:01:08	West HARP
2011-08-21 06:01:16	West HARP
2011-08-21 06:01:19	West HARP
2011-08-21 06:01:35	West HARP
2011-08-21 06:01:46	West HARP
2011-08-21 06:02:00	West HARP
2011-08-21 06:02:06	West HARP
2011-08-21 06:02:11	West HARP
2011-08-21 06:02:24	West HARP
2011-08-21 06:02:27	West HARP
2011-08-21 06:02:52	West HARP
2011-08-21 06:02:57	West HARP
2011-08-21 06:03:02	West HARP
2011-08-21 06:03:08	West HARP
2011-08-21 06:03:13	West HARP
2011-08-21 06:03:43	West HARP
2011-08-21 06:03:47	West HARP
2011-08-21 06:03:49	West HARP
2011-08-21 06:03:54	West HARP
2011-08-21 06:04:03	West HARP
2011-08-21 06:04:29	West HARP
2011-08-21 06:04:35	West HARP
2011-08-21 06:04:37	West HARP
2011-08-21 06:04:46	West HARP
2011-08-21 06:04:52	West HARP
2011-08-21 06:20:06	West HARP
2011-08-21 06:20:11	West HARP
2011-08-21 06:20:19	West HARP
2011-08-21 06:20:33	West HARP
2011-08-21 06:20:52	West HARP
2011-08-21 06:20:58	West HARP
2011-08-21 06:21:11	West HARP
2011-08-21 06:21:23	West HARP
2011-08-21 06:21:33	West HARP
2011-08-21 06:21:50	West HARP
2011-08-21 06:22:02	West HARP
2011-08-21 06:22:14	West HARP
2011-08-21 06:22:15	West HARP
2011-08-21 06:22:42	West HARP
2011-08-21 06:22:55	West HARP
2011-08-21 06:22:56	West HARP
2011-08-21 06:23:04	West HARP
2011-08-21 06:23:33	West HARP
2011-08-21 06:23:37	West HARP
2011-08-21 06:23:46	West HARP
2011-08-21 06:23:54	West HARP
2011-08-21 06:24:18	West HARP
2011-08-21 06:24:25	West HARP
2011-08-21 06:24:38	West HARP
2011-08-21 06:24:44	West HARP
2011-08-21 06:40:08	West HARP
2011-08-21 06:40:40	West HARP
2011-08-21 06:40:48	West HARP
2011-08-21 06:40:49	West HARP
2011-08-21 06:41:30	West HARP
2011-08-21 06:41:30	West HARP
2011-08-21 06:41:40	West HARP
2011-08-21 06:42:11	West HARP
2011-08-21 06:42:32	West HARP
2011-08-21 06:42:52	West HARP
2011-08-21 06:43:11	West HARP
2011-08-21 06:43:23	West HARP
2011-08-21 06:43:33	West HARP
2011-08-21 06:44:01	West HARP
2011-08-21 06:44:14	West HARP
2011-08-21 06:44:15	West HARP
2011-08-21 06:44:51	West HARP
2011-08-21 06:44:55	West HARP
2011-08-21 07:00:06	West HARP
2011-08-21 07:00:37	West HARP
2011-08-21 07:00:45	West HARP
2011-08-21 07:00:57	West HARP
2011-08-21 07:01:18	West HARP
2011-08-21 07:01:32	West HARP
2011-08-21 07:01:35	West HARP
2011-08-21 07:01:49	West HARP
2011-08-21 07:01:59	West HARP
2011-08-21 07:02:40	West HARP
2011-08-21 07:02:41	West HARP
2011-08-21 07:03:16	West HARP
2011-08-21 07:03:21	West HARP
2011-08-21 07:03:33	West HARP
2011-08-21 07:03:59	West HARP
2011-08-21 07:04:02	West HARP
2011-08-21 07:04:06	West HARP
2011-08-21 07:04:24	West HARP
2011-08-21 07:04:43	West HARP
2011-08-21 07:04:56	West HARP
2011-08-21 07:20:01	West HARP
2011-08-21 07:20:17	West HARP
2011-08-21 07:20:22	West HARP
2011-08-21 07:20:33	West HARP
2011-08-21 07:20:47	West HARP
2011-08-21 07:20:50	West HARP
2011-08-21 07:21:11	West HARP
2011-08-21 07:21:15	West HARP
2011-08-21 07:21:39	West HARP
2011-08-21 07:21:42	West HARP
2011-08-21 07:21:57	West HARP
2011-08-21 07:22:00	West HARP
2011-08-21 07:22:31	West HARP
2011-08-21 07:22:32	West HARP
2011-08-21 07:22:40	West HARP
2011-08-21 07:22:50	West HARP
2011-08-21 07:23:20	West HARP
2011-08-21 07:23:22	West HARP
2011-08-21 07:23:22	West HARP
2011-08-21 07:23:39	West HARP
2011-08-21 07:24:04	West HARP
2011-08-21 07:24:11	West HARP
2011-08-21 07:24:14	West HARP
2011-08-21 07:24:28	West HARP
2011-08-21 07:24:46	West HARP
2011-08-21 07:40:01	West HARP
2011-08-21 07:40:02	West HARP
2011-08-21 07:40:15	West HARP
2011-08-21 07:40:34	West HARP
2011-08-21 07:40:51	West HARP
2011-08-21 07:40:51	West HARP
2011-08-21 07:40:58	West HARP
2011-08-21 07:41:25	West HARP
2011-08-21 07:41:40	West HARP
2011-08-21 07:41:40	West HARP
2011-08-21 07:41:41	West HARP
2011-08-21 07:42:17	West HARP
2011-08-21 07:42:29	West HARP
2011-08-21 07:42:31	West HARP
2011-08-21 07:43:06	West HARP
2011-08-21 07:43:08	West HARP
2011-08-21 07:43:18	West HARP
2011-08-21 07:43:21	West HARP
2011-08-21 07:43:34	West HARP
2011-08-21 07:44:00	West HARP
2011-08-21 07:44:00	West HARP
2011-08-21 07:44:07	West HARP
2011-08-21 07:44:11	West HARP
2011-08-21 07:44:51	West HARP
2011-08-21 07:44:57	West HARP
2011-08-21 08:00:01	West HARP
2011-08-21 08:00:19	West HARP
2011-08-21 08:00:31	West HARP
2011-08-21 08:00:50	West HARP
2011-08-21 08:01:10	West HARP
2011-08-21 08:01:20	West HARP
2011-08-21 08:02:02	West HARP
2011-08-21 08:02:09	West HARP
2011-08-21 08:02:54	West HARP
2011-08-21 08:02:58	West HARP
2011-08-21 08:03:45	West HARP
2011-08-21 08:03:47	West HARP
2011-08-21 08:04:11	West HARP
2011-08-21 08:04:36	West HARP
2011-08-21 08:04:37	West HARP
2011-08-21 08:20:04	West HARP
2011-08-21 08:20:08	West HARP
2011-08-21 08:20:56	West HARP
2011-08-21 08:20:57	West HARP
2011-08-21 08:21:46	West HARP
2011-08-21 08:21:47	West HARP
2011-08-21 08:22:35	West HARP
2011-08-21 08:22:39	West HARP
2011-08-21 08:23:24	West HARP
2011-08-21 08:23:30	West HARP
2011-08-21 08:24:13	West HARP
2011-08-21 08:24:22	West HARP
2011-08-21 08:40:35	West HARP
2011-08-21 08:40:41	West HARP
2011-08-21 08:41:24	West HARP
2011-08-21 08:41:26	West HARP
2011-08-21 08:41:32	West HARP
2011-08-21 08:42:13	West HARP
2011-08-21 08:42:16	West HARP
2011-08-21 08:42:24	West HARP
2011-08-21 08:43:02	West HARP
2011-08-21 08:43:05	West HARP
2011-08-21 08:43:15	West HARP
2011-08-21 08:43:51	West HARP
2011-08-21 08:43:55	West HARP
2011-08-21 08:44:07	West HARP
2011-08-21 08:44:28	West HARP
2011-08-21 08:44:41	West HARP
2011-08-21 08:44:45	West HARP
2011-08-21 08:44:58	West HARP
2011-08-21 09:00:15	West HARP
2011-08-21 09:00:26	West HARP
2011-08-21 09:00:34	West HARP
2011-08-21 09:01:17	West HARP
2011-08-21 09:01:24	West HARP
2011-08-21 09:02:01	West HARP
2011-08-21 09:02:09	West HARP
2011-08-21 09:02:14	West HARP
2011-08-21 09:02:42	West HARP
2011-08-21 09:03:00	West HARP
2011-08-21 09:03:04	West HARP
2011-08-21 09:03:22	West HARP
2011-08-21 09:03:32	West HARP
2011-08-21 09:03:52	West HARP
2011-08-21 09:03:54	West HARP
2011-08-21 09:04:03	West HARP
2011-08-21 09:04:21	West HARP
2011-08-21 09:04:43	West HARP
2011-08-21 09:04:44	West HARP
2011-08-21 09:04:43	West HARP
2011-08-21 09:20:11	West HARP
2011-08-21 09:20:15	West HARP
2011-08-21 09:20:33	West HARP
2011-08-21 09:20:43	West HARP
2011-08-21 09:21:23	West HARP
2011-08-21 09:21:32	West HARP
2011-08-21 09:21:36	West HARP
2011-08-21 09:21:54	West HARP
2011-08-21 09:22:13	West HARP
2011-08-21 09:22:16	West HARP
2011-08-21 09:22:45	West HARP
2011-08-21 09:22:57	West HARP
2011-08-21 09:23:03	West HARP
2011-08-21 09:23:10	West HARP
2011-08-21 09:23:37	West HARP
2011-08-21 09:23:37	West HARP
2011-08-21 09:23:53	West HARP
2011-08-21 09:23:59	West HARP
2011-08-21 09:24:18	West HARP
2011-08-21 09:24:28	West HARP
2011-08-21 09:24:43	West HARP
2011-08-21 09:24:48	West HARP
2011-08-21 09:40:17	West HARP
2011-08-21 09:40:19	West HARP
2011-08-21 09:40:28	West HARP
2011-08-21 09:40:49	West HARP
2011-08-21 09:41:07	West HARP
2011-08-21 09:41:08	West HARP
2011-08-21 09:41:09	West HARP
2011-08-21 09:41:41	West HARP
2011-08-21 09:41:41	West HARP
2011-08-21 09:41:49	West HARP
2011-08-21 09:41:57	West HARP
2011-08-21 09:41:57	West HARP
2011-08-21 09:42:30	West HARP
2011-08-21 09:42:33	West HARP
2011-08-21 09:42:46	West HARP
2011-08-21 09:42:47	West HARP
2011-08-21 09:43:10	West HARP
2011-08-21 09:43:24	West HARP
2011-08-21 09:43:35	West HARP
2011-08-21 09:43:38	West HARP
2011-08-21 09:43:51	West HARP
2011-08-21 09:44:16	West HARP
2011-08-21 09:44:24	West HARP
2011-08-21 09:44:28	West HARP
2011-08-21 09:44:31	West HARP
2011-08-21 10:00:02	West HARP
2011-08-21 10:00:45	West HARP
2011-08-21 10:01:34	West HARP
2011-08-21 10:02:23	West HARP
2011-08-21 10:03:12	West HARP
2011-08-21 10:04:01	West HARP
2011-08-21 10:04:46	West HARP
2011-08-21 10:04:50	West HARP
2011-08-21 10:20:24	West HARP
2011-08-21 10:21:13	West HARP
2011-08-21 10:22:03	West HARP
2012-08-28 20:48:38	West HARP
2012-08-28 20:50:15	West HARP
2012-08-28 20:51:52	West HARP
2012-08-28 20:55:04	West HARP
2012-08-28 20:56:41	West HARP
2012-08-28 20:58:18	West HARP
2012-08-28 21:01:30	West HARP
2012-08-28 21:03:07	West HARP
2012-08-28 21:04:44	West HARP
2012-08-28 21:06:20	West HARP
2012-08-28 21:07:57	West HARP
2012-08-28 21:09:33	West HARP
2012-08-28 21:12:46	West HARP
2012-08-28 21:15:59	West HARP
2012-08-28 21:19:12	West HARP
2012-08-28 21:20:49	West HARP
2012-08-28 21:22:26	West HARP
2012-08-28 21:24:02	West HARP
2012-08-28 21:25:39	West HARP
2012-08-28 21:27:15	West HARP
2012-08-28 21:28:52	West HARP
2012-08-28 21:30:29	West HARP
2012-08-28 21:32:05	West HARP
2012-08-28 21:33:42	West HARP
2012-08-28 21:36:55	West HARP
2012-08-28 21:38:32	West HARP
2012-08-28 21:40:08	West HARP
2012-08-28 21:43:21	West HARP
2012-08-28 21:44:58	West HARP
2012-08-28 21:46:34	West HARP
2012-08-28 21:48:11	West HARP
2012-08-28 21:49:48	West HARP
2012-08-28 21:51:24	West HARP
2012-08-28 21:54:38	West HARP
2012-08-28 21:56:14	West HARP
2012-08-28 21:57:51	West HARP
2012-08-28 22:01:05	West HARP
2012-08-28 22:02:42	West HARP
2012-08-28 22:04:18	West HARP
2012-08-28 22:07:32	West HARP
2012-08-28 22:09:09	West HARP
2012-08-28 22:10:46	West HARP
2012-08-28 22:12:22	West HARP
2012-08-28 22:13:03	West HARP
2012-08-28 22:14:40	West HARP
2012-08-28 22:52:31	West HARP
2012-08-28 22:54:08	West HARP
2012-08-28 22:55:44	West HARP
2012-08-28 22:57:21	West HARP
2012-08-28 22:58:58	West HARP
2012-08-28 23:00:35	West HARP
2012-08-28 23:02:12	West HARP
2012-08-28 23:03:48	West HARP
2012-08-28 23:07:02	West HARP
2012-08-28 23:08:38	West HARP
2012-08-28 23:10:15	West HARP
2012-08-28 23:13:27	West HARP
2012-08-28 23:15:04	West HARP
2012-08-28 23:16:41	West HARP
2012-08-28 23:18:17	West HARP
2012-08-28 23:19:54	West HARP
2012-08-28 23:21:30	West HARP
2012-08-28 23:24:44	West HARP
2012-08-28 23:26:20	West HARP
2012-08-28 23:27:57	West HARP
2012-08-29 01:33:01	West HARP
2012-08-29 01:33:39	West HARP
2012-08-29 01:34:54	West HARP
2012-08-29 01:36:30	West HARP
2012-08-29 01:38:06	West HARP
2012-08-29 01:39:42	West HARP
2012-08-29 01:42:54	West HARP
2012-08-29 01:42:54	West HARP
2012-08-29 01:44:30	West HARP
2012-08-29 01:46:06	West HARP
2012-08-29 01:49:19	West HARP
2012-08-29 01:50:56	West HARP
2012-08-30 09:50:53	West HARP
2012-08-30 09:52:31	West HARP
2012-08-30 09:54:07	West HARP
2012-08-30 09:55:45	West HARP
2012-08-30 09:57:21	West HARP
2012-08-30 10:02:10	West HARP
2012-08-30 10:06:59	West HARP
2012-08-30 10:10:13	West HARP
2012-08-30 14:49:02	West HARP
2012-08-30 14:50:39	West HARP
2012-08-30 14:52:15	West HARP
2012-08-30 14:55:27	West HARP
2012-08-30 14:57:03	West HARP
2012-08-30 14:58:40	West HARP
2012-08-30 15:08:17	West HARP
2012-08-30 15:37:06	West HARP
2012-08-30 15:38:43	West HARP
2012-08-30 15:40:19	West HARP
2012-08-30 15:43:31	West HARP
2012-08-30 15:45:07	West HARP
2012-08-30 15:46:43	West HARP
2012-08-30 15:48:19	West HARP
2012-08-30 15:49:55	West HARP
2012-08-30 15:51:31	West HARP
2012-08-30 15:54:43	West HARP
2012-08-30 15:56:19	West HARP
2012-08-30 16:01:08	West HARP
2012-08-30 16:02:44	West HARP
2012-08-30 16:04:20	West HARP
2012-08-30 16:07:32	West HARP
2012-08-30 16:09:08	West HARP
2012-08-30 16:10:45	West HARP
2012-08-30 16:12:21	West HARP
2012-08-30 16:13:57	West HARP
2012-08-30 16:15:33	West HARP
2012-08-30 16:18:45	West HARP
2012-08-30 16:20:22	West HARP
2012-08-30 16:21:58	West HARP
2012-08-30 16:25:10	West HARP
2012-08-30 16:26:46	West HARP
2012-08-30 16:28:22	West HARP
2012-08-30 22:52:23	West HARP
2012-08-30 22:55:36	West HARP
2012-08-30 22:57:12	West HARP
2012-08-30 22:58:49	West HARP
2012-08-30 23:21:18	West HARP
2012-08-30 23:30:54	West HARP
2012-08-30 23:38:55	West HARP
2012-08-30 23:40:32	West HARP
2012-08-30 23:43:45	West HARP
2012-08-30 23:45:20	West HARP
2012-08-30 23:50:09	West HARP
2012-08-30 23:54:57	West HARP
2012-08-30 23:58:10	West HARP
2012-08-31 00:02:58	West HARP
2012-08-31 00:06:10	West HARP
2012-08-31 00:07:46	West HARP
2012-08-31 00:09:23	West HARP
2012-08-31 00:12:36	West HARP
2012-08-31 00:14:11	West HARP
2012-08-31 00:15:48	West HARP
2012-08-31 00:22:13	West HARP
2012-08-31 00:25:26	West HARP
2012-08-31 00:30:15	West HARP
2012-08-31 00:31:51	West HARP
2012-08-31 00:33:28	West HARP
2012-08-31 00:36:41	West HARP
2012-08-31 00:39:54	West HARP
2012-08-31 00:43:07	West HARP
2012-08-31 00:44:43	West HARP
2012-08-31 00:46:20	West HARP
2012-08-31 00:49:32	West HARP
2012-08-31 00:51:09	West HARP
2012-08-31 00:52:45	West HARP
2012-08-31 00:54:22	West HARP
2012-08-31 00:55:58	West HARP
2012-08-31 01:00:48	West HARP
2012-08-31 01:04:01	West HARP
2012-08-31 01:10:28	West HARP
2012-08-31 01:12:05	West HARP
2012-08-31 01:13:41	West HARP
2012-08-31 01:15:17	West HARP
2012-08-31 01:16:53	West HARP
2012-08-31 01:18:28	West HARP
2012-08-31 01:20:05	West HARP
2012-08-31 01:21:41	West HARP
2012-08-31 01:24:53	West HARP
2012-08-31 01:26:28	West HARP
2012-08-31 01:28:05	West HARP
2012-08-31 01:31:17	West HARP
2012-08-31 01:32:52	West HARP
2012-08-31 01:34:28	West HARP
2012-08-31 01:36:05	West HARP
2012-08-31 01:45:44	West HARP
2012-08-31 01:48:57	West HARP
2012-08-31 01:52:10	West HARP
2012-08-31 01:55:22	West HARP
2012-08-31 02:20:56	West HARP
2012-08-31 02:22:32	West HARP
2012-08-31 02:24:08	West HARP
2012-08-31 02:25:44	West HARP
2012-08-31 02:27:20	West HARP
2012-08-31 02:30:32	West HARP
2012-08-31 02:32:09	West HARP
2012-08-31 02:33:45	West HARP
2012-08-31 02:36:58	West HARP
2012-08-31 02:38:34	West HARP
2012-08-31 02:40:11	West HARP
2012-08-31 02:43:24	West HARP
2012-08-31 02:45:01	West HARP
2012-08-31 02:46:38	West HARP
2012-08-31 02:49:51	West HARP
2012-08-31 02:51:27	West HARP
2012-08-31 02:54:38	West HARP
2012-08-31 02:56:14	West HARP
2012-08-31 02:57:50	West HARP
2012-08-31 03:01:02	West HARP
2012-08-31 03:02:38	West HARP
2012-08-31 03:04:14	West HARP
2012-08-31 03:07:26	West HARP
2012-08-31 03:09:02	West HARP
2012-08-31 03:10:38	West HARP
2012-08-31 03:12:14	West HARP
2012-08-31 03:21:52	West HARP
2012-08-31 03:25:05	West HARP
2012-08-31 03:26:42	West HARP
2012-08-31 03:28:18	West HARP
2012-08-31 03:31:31	West HARP
2012-08-31 12:01:41	West HARP
2012-08-31 12:03:18	West HARP
2012-08-31 12:04:54	West HARP
2012-08-31 12:06:30	West HARP
2012-08-31 12:08:07	West HARP
2012-08-31 12:09:44	West HARP
2012-08-31 12:12:56	West HARP
2012-08-31 12:14:33	West HARP
2012-08-31 12:16:09	West HARP
2012-08-31 12:19:26	West HARP
2012-08-31 12:21:04	West HARP
2012-08-31 12:22:41	West HARP
2012-08-31 12:24:18	West HARP
2012-08-31 12:25:56	West HARP
2012-08-31 12:27:34	West HARP
2012-08-31 12:30:50	West HARP
2012-08-31 12:32:28	West HARP
2012-08-31 12:34:06	West HARP
2012-08-31 12:37:22	West HARP
2012-08-31 12:39:00	West HARP
2012-08-31 12:40:38	West HARP
2012-08-31 12:42:16	West HARP
2012-08-31 12:43:54	West HARP
2012-08-31 12:45:32	West HARP
2012-08-31 12:48:48	West HARP
2012-08-31 12:50:26	West HARP
2012-08-31 12:52:04	West HARP
2012-08-31 12:55:20	West HARP
2012-08-31 12:56:57	West HARP
2012-08-31 12:58:35	West HARP
2012-08-31 13:00:12	West HARP
2012-08-31 13:01:50	West HARP
2012-08-31 13:03:28	West HARP
2012-08-31 13:06:43	West HARP
2012-08-31 13:08:21	West HARP
2012-08-31 13:09:59	West HARP
2012-08-31 13:13:15	West HARP
2012-08-31 13:14:53	West HARP
2012-08-31 13:16:31	West HARP
2012-08-31 13:18:09	West HARP
2012-08-31 13:19:46	West HARP
2012-08-31 13:21:24	West HARP
2012-08-31 13:24:40	West HARP
2012-08-31 13:26:18	West HARP
2012-08-31 13:27:55	West HARP
2012-08-31 13:31:11	West HARP
2012-08-31 13:32:49	West HARP
2012-08-31 13:34:26	West HARP
2012-08-31 13:36:04	West HARP
2012-08-31 13:37:42	West HARP
2012-08-31 13:39:19	West HARP
2012-08-31 13:40:57	West HARP
2012-08-31 13:42:35	West HARP
2012-08-31 13:44:13	West HARP
2012-08-31 13:45:50	West HARP
2012-08-31 13:49:06	West HARP
2012-08-31 13:50:43	West HARP
2012-08-31 13:52:21	West HARP
2012-08-31 13:54:00	West HARP
2012-08-31 13:55:36	West HARP
2012-08-31 13:57:14	West HARP
2012-08-31 13:58:52	West HARP
2012-08-31 14:00:30	West HARP
2012-08-31 14:02:07	West HARP
2012-08-31 14:03:45	West HARP
2012-08-31 14:07:00	West HARP
2012-08-31 14:08:38	West HARP
2012-08-31 14:10:16	West HARP
2012-08-31 14:13:31	West HARP
2012-08-31 14:15:09	West HARP
2012-08-31 14:16:47	West HARP
2012-08-31 14:18:25	West HARP
2012-08-31 14:20:03	West HARP
2012-08-31 14:21:41	West HARP
2012-08-31 14:24:58	West HARP
2012-08-31 14:26:36	West HARP
2012-08-31 14:28:14	West HARP
2012-08-31 14:31:30	West HARP
2012-08-31 14:33:08	West HARP
2012-08-31 14:34:46	West HARP
2012-08-31 14:36:24	West HARP
2012-08-31 14:38:02	West HARP
2012-08-31 14:39:40	West HARP
2012-08-31 14:42:56	West HARP
2012-08-31 14:44:35	West HARP
2012-08-31 14:46:12	West HARP
2012-08-31 14:49:27	West HARP
2012-08-31 14:51:05	West HARP
2012-08-31 14:52:44	West HARP
2012-08-31 14:54:21	West HARP
2012-08-31 14:55:59	West HARP
2012-08-31 14:57:37	West HARP
2012-08-31 15:00:54	West HARP
2012-08-31 15:02:32	West HARP
2012-08-31 15:04:09	West HARP
2012-08-31 15:07:25	West HARP
2012-08-31 15:09:03	West HARP
2012-08-31 15:10:41	West HARP
2012-08-31 15:12:19	West HARP
2012-08-31 15:13:57	West HARP
2012-08-31 15:15:35	West HARP
2012-08-31 15:18:51	West HARP
2012-08-31 15:20:30	West HARP
2012-08-31 15:22:07	West HARP
2012-08-31 15:25:23	West HARP
2012-08-31 15:27:01	West HARP
2012-08-31 15:28:39	West HARP
2012-08-31 15:30:17	West HARP
2012-08-31 15:31:55	West HARP
2012-08-31 15:33:33	West HARP
2012-08-31 15:36:49	West HARP
2012-08-31 15:38:27	West HARP
2012-08-31 15:40:06	West HARP
2012-08-31 15:43:21	West HARP
2012-08-31 15:45:00	West HARP
2012-08-31 15:46:38	West HARP
2012-08-31 15:48:15	West HARP
2012-08-31 15:49:54	West HARP
2012-08-31 15:51:32	West HARP
2012-08-31 15:54:48	West HARP
2012-08-31 15:56:26	West HARP
2012-08-31 15:58:04	West HARP
2012-08-31 16:01:21	West HARP
2012-08-31 16:02:58	West HARP
2012-08-31 16:04:38	West HARP
2012-08-31 16:06:15	West HARP
2012-08-31 16:06:15	West HARP
2012-08-31 16:07:54	West HARP
2012-08-31 16:09:32	West HARP
2012-08-31 16:12:48	West HARP
2012-08-31 16:14:27	West HARP
2012-08-31 16:19:20	West HARP
2012-08-31 16:20:59	West HARP
2012-08-31 16:22:38	West HARP
2012-08-31 16:24:16	West HARP
2012-08-31 16:25:54	West HARP
2012-08-31 16:27:32	West HARP
2012-08-31 16:30:49	West HARP
2012-08-31 16:32:27	West HARP
2012-08-31 16:34:05	West HARP
2012-08-31 16:37:22	West HARP
2012-08-31 16:39:01	West HARP
2012-08-31 16:40:40	West HARP
2012-08-31 16:42:18	West HARP
2012-08-31 16:43:56	West HARP
2012-08-31 16:48:52	West HARP
2012-08-31 20:45:55	West HARP
2012-08-31 20:49:11	West HARP
2012-08-31 20:50:50	West HARP
2012-08-31 20:52:28	West HARP
2012-08-31 20:54:06	West HARP
2012-08-31 20:55:45	West HARP
2012-08-31 20:57:23	West HARP
2012-08-31 21:00:40	West HARP
2012-08-31 21:02:18	West HARP
2012-08-31 21:03:56	West HARP
2012-08-31 21:43:07	West HARP
2012-08-31 21:44:45	West HARP
2012-08-31 21:46:23	West HARP
2012-08-31 21:48:01	West HARP
2012-08-31 21:49:39	West HARP
2012-08-31 21:51:17	West HARP
2012-08-31 21:52:55	West HARP
2012-08-31 21:54:32	West HARP
2012-08-31 21:56:11	West HARP
2012-08-31 21:57:49	West HARP
2012-08-31 22:01:04	West HARP
2012-08-31 22:02:42	West HARP
2012-08-31 22:04:20	West HARP
2012-08-31 22:06:00	West HARP
2012-08-31 22:07:37	West HARP
2012-08-31 22:09:15	West HARP
2012-08-31 22:10:52	West HARP
2012-08-31 22:12:30	West HARP
2012-08-31 22:14:08	West HARP
2012-08-31 22:15:47	West HARP
2012-08-31 22:19:05	West HARP
2012-08-31 22:20:45	West HARP
2012-08-31 22:22:24	West HARP
2012-08-31 22:24:01	West HARP
2012-08-31 22:25:39	West HARP
2012-08-31 22:27:18	West HARP
2012-08-31 22:28:56	West HARP
2012-08-31 22:30:34	West HARP
2012-08-31 22:32:13	West HARP
2012-08-31 22:33:51	West HARP
2012-08-31 22:37:08	West HARP
2012-08-31 22:38:46	West HARP
2012-08-31 22:40:24	West HARP
2012-08-31 22:42:01	West HARP
2012-08-31 22:43:39	West HARP
2012-08-31 22:45:18	West HARP
2012-08-31 22:46:57	West HARP
2012-08-31 22:48:35	West HARP
2012-08-31 22:50:13	West HARP
2012-08-31 22:51:51	West HARP
2012-08-31 22:55:05	West HARP
2012-08-31 22:56:43	West HARP
2012-08-31 22:58:21	West HARP
2012-08-31 23:00:00	West HARP
2012-08-31 23:01:37	West HARP
2012-08-31 23:03:15	West HARP
2012-08-31 23:04:52	West HARP
2012-08-31 23:06:30	West HARP
2012-08-31 23:08:09	West HARP
2012-08-31 23:09:48	West HARP
2012-08-31 23:13:04	West HARP
2012-08-31 23:14:42	West HARP
2012-08-31 23:16:21	West HARP
2012-08-31 23:18:00	West HARP
2012-08-31 23:19:37	West HARP
2012-08-31 23:22:52	West HARP
2012-08-31 23:24:31	West HARP
2012-08-31 23:26:09	West HARP
2012-08-31 23:27:47	West HARP
2012-08-31 23:31:04	West HARP
2012-08-31 23:32:42	West HARP
2012-08-31 23:34:20	West HARP
2012-08-31 23:36:00	West HARP
2012-08-31 23:37:37	West HARP
2012-08-31 23:39:15	West HARP
2012-08-31 23:40:53	West HARP
2012-08-31 23:42:31	West HARP
2012-08-31 23:44:10	West HARP
2012-08-31 23:45:48	West HARP
2012-08-31 23:49:05	West HARP
2012-09-01 03:28:31	West HARP
2012-09-01 03:32:45	West HARP
2012-09-01 03:34:27	West HARP
2012-09-01 03:36:59	West HARP
2012-09-01 03:38:40	West HARP
2012-09-01 03:39:31	West HARP
2012-09-01 03:40:22	West HARP
2012-09-01 03:42:04	West HARP
2012-09-01 03:42:55	West HARP
2012-09-01 03:43:45	West HARP
2012-09-01 03:44:36	West HARP
2012-09-01 03:45:27	West HARP
2012-09-21 00:31:53	West HARP
2012-09-21 00:32:05	West HARP
2012-09-21 00:32:17	West HARP
2012-09-21 00:32:30	West HARP
2012-09-21 00:32:41	West HARP
2012-09-21 00:32:54	West HARP
2012-09-21 00:33:06	West HARP
2012-09-21 00:33:18	West HARP
2012-09-21 00:33:30	West HARP
2012-09-21 00:33:42	West HARP
2012-09-21 00:33:54	West HARP
2012-09-21 00:34:06	West HARP
2012-09-21 00:34:19	West HARP
2012-09-21 00:34:31	West HARP
2012-09-21 00:34:43	West HARP
2012-09-21 00:34:56	West HARP
2012-09-21 00:36:08	West HARP
2012-09-21 00:36:08	West HARP
2012-09-21 00:36:21	West HARP
2012-09-21 00:36:33	West HARP
2012-09-21 00:36:45	West HARP
2012-09-21 00:36:57	West HARP
2012-09-21 00:37:09	West HARP
2012-09-21 00:37:21	West HARP
2012-09-21 00:37:33	West HARP
2012-09-21 00:37:46	West HARP
2012-09-21 00:37:58	West HARP
2012-09-21 00:38:10	West HARP
2012-09-21 00:38:22	West HARP
2012-09-21 00:38:34	West HARP
2012-09-21 00:38:47	West HARP
2012-09-21 00:38:59	West HARP
2012-09-21 00:39:11	West HARP
2012-09-21 00:39:23	West HARP
2012-09-21 00:39:36	West HARP
2012-09-21 00:39:47	West HARP
2012-09-21 00:40:00	West HARP
2012-09-21 00:40:12	West HARP
2012-09-21 00:40:25	West HARP
2012-09-21 00:40:37	West HARP
2012-09-21 00:40:49	West HARP
2012-09-21 00:42:02	West HARP
2012-09-21 00:42:14	West HARP
2012-09-21 00:42:26	West HARP
2012-09-21 00:42:39	West HARP
2012-09-21 00:42:51	West HARP
2012-09-21 00:43:03	West HARP
2012-09-21 00:43:15	West HARP
2012-09-21 00:43:27	West HARP
2012-09-21 00:43:39	West HARP
2012-09-21 00:43:51	West HARP
2012-09-21 00:44:03	West HARP
2012-09-21 00:44:16	West HARP
2012-09-21 00:44:28	West HARP
2012-09-21 00:44:40	West HARP
2012-09-21 00:44:52	West HARP
2012-09-21 00:45:04	West HARP
2012-09-21 00:45:17	West HARP
2012-09-21 00:45:29	West HARP
2012-09-21 00:45:41	West HARP
2012-09-21 00:45:54	West HARP
2012-09-21 00:46:06	West HARP
2012-09-21 00:46:18	West HARP
2012-09-21 00:46:30	West HARP
2012-09-21 00:46:43	West HARP
2012-09-21 00:46:55	West HARP
2012-09-21 00:48:08	West HARP
2012-09-21 00:48:21	West HARP
2012-09-21 00:48:33	West HARP
2012-09-21 00:48:45	West HARP
2012-09-21 00:48:58	West HARP
2012-09-21 00:49:10	West HARP
2012-09-21 00:49:22	West HARP
2012-09-21 00:49:34	West HARP
2012-09-21 00:49:47	West HARP
2012-09-21 00:49:59	West HARP
2012-09-21 00:50:36	West HARP
2012-09-21 00:50:48	West HARP
2012-09-21 00:51:01	West HARP
2012-09-21 00:51:13	West HARP
2012-09-21 00:51:25	West HARP
2012-09-21 00:51:38	West HARP
2012-09-21 00:51:50	West HARP
2012-09-21 00:52:02	West HARP
2012-09-21 00:52:14	West HARP
2012-09-21 00:52:27	West HARP
2012-09-21 00:52:39	West HARP
2012-09-21 00:52:51	West HARP
2012-09-21 00:54:05	West HARP
2012-09-21 00:54:17	West HARP
2012-09-21 00:54:30	West HARP
2012-09-21 00:54:42	West HARP
2012-09-21 00:54:54	West HARP
2012-09-21 00:55:06	West HARP
2012-09-21 00:55:19	West HARP
2012-09-21 00:55:30	West HARP
2012-09-21 00:55:43	West HARP
2012-09-21 00:55:55	West HARP
2012-09-21 00:56:07	West HARP
2012-09-21 00:56:19	West HARP
2012-09-21 00:56:32	West HARP
2012-09-21 00:56:44	West HARP
2012-09-21 00:56:56	West HARP
2012-09-21 00:57:09	West HARP
2012-09-21 00:57:21	West HARP
2012-09-21 00:57:33	West HARP
2012-09-21 00:57:46	West HARP
2012-09-21 00:57:58	West HARP
2012-09-21 00:58:10	West HARP
2012-09-21 00:58:22	West HARP
2012-09-21 00:58:35	West HARP
2012-09-21 00:58:47	West HARP
2012-09-21 00:58:59	West HARP
2012-09-21 01:00:00	West HARP
2012-09-21 01:00:12	West HARP
2012-09-21 01:00:24	West HARP
2013-12-12 11:11:22	West HARP
2013-12-12 11:12:02	West HARP
2013-12-12 11:12:42	West HARP
2013-12-12 11:13:22	West HARP
2013-12-12 11:16:02	West HARP
2013-12-12 11:16:03	West HARP
2013-12-12 11:16:42	West HARP
2013-12-12 11:17:22	West HARP
2013-12-12 11:18:02	West HARP
2013-12-12 11:18:42	West HARP
2013-12-12 11:19:22	West HARP
2013-12-12 11:20:02	West HARP
2013-12-12 11:20:42	West HARP
2013-12-12 11:23:22	West HARP
2013-12-12 11:24:43	West HARP
2013-12-12 11:25:22	West HARP
2013-12-12 11:26:02	West HARP
2013-12-12 11:26:43	West HARP
2013-12-12 11:27:22	West HARP
2013-12-12 11:30:02	West HARP
2013-12-12 11:30:02	West HARP
2013-12-12 11:30:42	West HARP
2013-12-12 11:31:23	West HARP
2013-12-12 11:32:04	West HARP
2013-12-12 11:32:42	West HARP
2013-12-12 11:33:22	West HARP
2013-12-12 11:34:02	West HARP
2013-12-12 11:34:43	West HARP
2013-12-12 11:37:24	West HARP
2013-12-12 11:38:02	West HARP
2013-12-12 11:38:42	West HARP
2013-12-12 11:39:22	West HARP
2013-12-12 11:40:02	West HARP
2013-12-12 11:40:42	West HARP
2013-12-12 11:41:21	West HARP
2013-12-12 11:44:02	West HARP
2013-12-12 11:44:42	West HARP
2013-12-12 11:45:21	West HARP
2013-12-12 11:46:02	West HARP
2013-12-12 11:46:41	West HARP
2013-12-12 11:47:22	West HARP
2013-12-12 11:48:02	West HARP
2013-12-12 11:48:41	West HARP
2013-12-12 11:51:22	West HARP
2013-12-12 11:52:02	West HARP
2013-12-12 11:52:42	West HARP
2013-12-12 11:53:22	West HARP
2013-12-12 11:54:02	West HARP
2013-12-12 11:54:42	West HARP
2013-12-12 11:55:22	West HARP
2013-12-12 11:58:02	West HARP
2013-12-12 11:58:42	West HARP
2013-12-12 11:59:22	West HARP
2013-12-12 11:59:56	West HARP
2013-12-12 12:00:44	West HARP
2013-12-12 12:01:22	West HARP
2013-12-12 12:02:02	West HARP
2013-12-12 12:02:44	West HARP
2013-12-12 12:05:24	West HARP
2013-12-12 12:06:04	West HARP
2013-12-12 12:06:45	West HARP
2013-12-12 12:07:25	West HARP
2013-12-12 12:08:05	West HARP
2013-12-12 12:08:45	West HARP
2013-12-12 12:09:25	West HARP
2013-12-12 12:12:05	West HARP
2013-12-12 12:12:45	West HARP
2013-12-12 12:13:25	West HARP
2013-12-12 12:14:05	West HARP
2013-12-12 12:14:45	West HARP
2013-12-12 12:15:26	West HARP
2013-12-12 12:16:05	West HARP
2013-12-12 12:16:45	West HARP
2011-08-21 02:20:19	East HARP
2011-08-21 02:20:40	East HARP
2011-08-21 02:20:58	East HARP
2011-08-21 02:21:00	East HARP
2011-08-21 02:21:29	East HARP
2011-08-21 02:21:41	East HARP
2011-08-21 02:22:13	East HARP
2011-08-21 02:22:18	East HARP
2011-08-21 02:23:03	East HARP
2011-08-21 02:23:08	East HARP
2011-08-21 02:23:44	East HARP
2011-08-21 02:23:57	East HARP
2011-08-21 02:24:02	East HARP
2011-08-21 02:24:25	East HARP
2011-08-21 02:24:36	East HARP
2011-08-21 02:24:46	East HARP
2011-08-21 02:24:55	East HARP
2011-08-21 02:40:03	East HARP
2011-08-21 02:40:11	East HARP
2011-08-21 02:40:20	East HARP
2011-08-21 02:40:37	East HARP
2011-08-21 02:40:52	East HARP
2011-08-21 02:40:53	East HARP
2011-08-21 02:40:55	East HARP
2011-08-21 02:41:01	East HARP
2011-08-21 02:41:10	East HARP
2011-08-21 02:41:33	East HARP
2011-08-21 02:41:33	East HARP
2011-08-21 02:41:46	East HARP
2011-08-21 02:41:47	East HARP
2011-08-21 02:41:59	East HARP
2011-08-21 02:42:14	East HARP
2011-08-21 02:42:24	East HARP
2011-08-21 02:42:38	East HARP
2011-08-21 02:42:41	East HARP
2011-08-21 02:42:48	East HARP
2011-08-21 02:42:55	East HARP
2011-08-21 02:43:14	East HARP
2011-08-21 02:43:29	East HARP
2011-08-21 02:43:36	East HARP
2011-08-21 02:43:36	East HARP
2011-08-21 02:44:05	East HARP
2011-08-21 02:44:17	East HARP
2011-08-21 02:44:21	East HARP
2011-08-21 02:44:27	East HARP
2011-08-21 02:44:30	East HARP
2011-08-21 02:44:55	East HARP
2011-08-21 02:44:58	East HARP
2011-08-21 03:00:04	East HARP
2011-08-21 03:00:05	East HARP
2011-08-21 03:00:10	East HARP
2011-08-21 03:00:40	East HARP
2011-08-21 03:00:40	East HARP
2011-08-21 03:00:54	East HARP
2011-08-21 03:00:54	East HARP
2011-08-21 03:01:04	East HARP
2011-08-21 03:01:21	East HARP
2011-08-21 03:01:32	East HARP
2011-08-21 03:01:44	East HARP
2011-08-21 03:01:45	East HARP
2011-08-21 03:01:59	East HARP
2011-08-21 03:02:23	East HARP
2011-08-21 03:02:35	East HARP
2011-08-21 03:02:43	East HARP
2011-08-21 03:02:53	East HARP
2011-08-21 03:03:15	East HARP
2011-08-21 03:03:24	East HARP
2011-08-21 03:03:25	East HARP
2011-08-21 03:03:47	East HARP
2011-08-21 03:04:05	East HARP
2011-08-21 03:04:07	East HARP
2011-08-21 03:04:12	East HARP
2011-08-21 03:04:16	East HARP
2011-08-21 03:04:42	East HARP
2011-08-21 03:04:58	East HARP
2011-08-21 03:20:07	East HARP
2011-08-21 03:20:30	East HARP
2011-08-21 03:21:01	East HARP
2011-08-21 03:21:18	East HARP
2011-08-21 03:21:22	East HARP
2011-08-21 03:21:52	East HARP
2011-08-21 03:22:10	East HARP
2011-08-21 03:22:14	East HARP
2011-08-21 03:23:01	East HARP
2011-08-21 03:23:06	East HARP
2011-08-21 03:23:53	East HARP
2011-08-21 03:23:57	East HARP
2011-08-21 03:24:45	East HARP
2011-08-21 03:40:04	East HARP
2011-08-21 03:40:11	East HARP
2011-08-21 03:40:43	East HARP
2011-08-21 03:40:54	East HARP
2011-08-21 03:41:03	East HARP
2011-08-21 03:41:35	East HARP
2011-08-21 03:41:44	East HARP
2011-08-21 03:41:55	East HARP
2011-08-21 03:42:26	East HARP
2011-08-21 03:42:46	East HARP
2011-08-21 03:42:54	East HARP
2011-08-21 03:43:18	East HARP
2011-08-21 03:43:46	East HARP
2011-08-21 03:44:00	East HARP
2011-08-21 03:44:14	East HARP
2011-08-21 03:44:38	East HARP
2011-08-21 03:44:51	East HARP
2011-08-21 04:00:06	East HARP
2011-08-21 04:00:06	East HARP
2011-08-21 04:00:20	East HARP
2011-08-21 04:00:56	East HARP
2011-08-21 04:01:12	East HARP
2011-08-21 04:01:46	East HARP
2011-08-21 04:02:04	East HARP
2011-08-21 04:02:36	East HARP
2011-08-21 04:02:55	East HARP
2011-08-21 04:03:26	East HARP
2011-08-21 04:03:47	East HARP
2011-08-21 04:04:16	East HARP
2011-08-21 04:04:38	East HARP
2011-08-21 04:20:05	East HARP
2011-08-21 04:20:08	East HARP
2011-08-21 04:20:55	East HARP
2011-08-21 04:20:59	East HARP
2011-08-21 04:21:45	East HARP
2011-08-21 04:21:51	East HARP
2011-08-21 04:22:35	East HARP
2011-08-21 04:22:42	East HARP
2011-08-21 04:23:24	East HARP
2011-08-21 04:23:34	East HARP
2011-08-21 04:24:15	East HARP
2011-08-21 04:24:25	East HARP
2011-08-21 04:40:44	East HARP
2011-08-21 04:41:35	East HARP
2011-08-21 04:42:27	East HARP
2011-08-21 04:43:18	East HARP
2011-08-21 04:43:27	East HARP
2011-08-21 04:44:10	East HARP
2011-08-21 04:44:17	East HARP
2011-08-21 05:00:06	East HARP
2011-08-21 05:00:28	East HARP
2011-08-21 05:00:34	East HARP
2011-08-21 05:00:56	East HARP
2011-08-21 05:01:19	East HARP
2011-08-21 05:01:23	East HARP
2011-08-21 05:01:46	East HARP
2011-08-21 05:02:11	East HARP
2011-08-21 05:02:12	East HARP
2011-08-21 05:02:36	East HARP
2011-08-21 05:03:00	East HARP
2011-08-21 05:03:02	East HARP
2011-08-21 05:03:26	East HARP
2011-08-21 05:03:49	East HARP
2011-08-21 05:03:54	East HARP
2011-08-21 05:04:16	East HARP
2011-08-21 05:04:38	East HARP
2011-08-21 05:04:45	East HARP
2011-08-21 05:20:10	East HARP
2011-08-21 05:20:12	East HARP
2011-08-21 05:20:59	East HARP
2011-08-21 05:21:04	East HARP
2011-08-21 05:21:48	East HARP
2011-08-21 05:21:55	East HARP
2011-08-21 05:22:37	East HARP
2011-08-21 05:22:47	East HARP
2011-08-21 05:23:26	East HARP
2011-08-21 05:23:38	East HARP
2011-08-21 05:24:15	East HARP
2011-08-21 05:24:30	East HARP
2011-08-21 05:40:00	East HARP
2011-08-21 05:40:35	East HARP
2011-08-21 05:40:49	East HARP
2011-08-21 05:41:39	East HARP
2011-08-21 05:42:30	East HARP
2011-08-21 05:43:20	East HARP
2011-08-21 05:44:10	East HARP
2011-08-21 06:00:01	East HARP
2011-08-21 06:00:43	East HARP
2011-08-21 06:00:51	East HARP
2011-08-21 06:01:34	East HARP
2011-08-21 06:01:41	East HARP
2011-08-21 08:44:32	East HARP
2011-08-21 09:00:51	East HARP
2011-08-21 09:01:42	East HARP
2011-08-21 09:02:34	East HARP
2011-08-21 09:03:26	East HARP
2011-08-21 09:04:17	East HARP
2011-08-21 09:21:28	East HARP
2011-08-21 09:22:19	East HARP
2011-08-21 09:23:11	East HARP
2011-08-21 09:24:02	East HARP
2011-08-21 09:42:06	East HARP
2012-08-27 12:20:36	East HARP
2012-08-27 14:28:51	East HARP
2012-08-27 19:50:50	East HARP
2012-08-27 20:31:49	East HARP
2012-08-27 22:43:02	East HARP
2012-08-27 23:46:33	East HARP
2012-08-28 03:30:13	East HARP
2012-08-28 04:25:06	East HARP
2012-08-28 05:21:18	East HARP
2012-08-28 06:20:44	East HARP
2012-08-28 13:10:11	East HARP
2012-08-28 22:50:44	East HARP
2012-08-29 01:32:49	East HARP
2012-08-29 07:51:43	East HARP
2012-08-29 09:45:07	East HARP
2012-08-29 10:52:15	East HARP
2012-08-29 12:04:51	East HARP
2012-08-29 13:14:09	East HARP
2012-08-29 18:36:38	East HARP
2012-08-29 23:54:42	East HARP
2012-08-30 12:18:40	East HARP
2012-08-30 14:45:34	East HARP
2012-08-30 17:24:31	East HARP
2012-08-30 18:01:26	East HARP
2012-08-30 18:36:44	East HARP
2012-08-31 00:02:50	East HARP
2012-08-31 04:19:38	East HARP
2012-08-31 06:00:36	East HARP
2012-08-31 06:50:20	East HARP
2012-08-31 10:28:16	East HARP
2012-08-31 10:55:39	East HARP
2012-08-31 19:36:52	East HARP
2012-09-01 10:54:35	East HARP
2012-09-01 17:42:32	East HARP
2012-09-01 19:22:14	East HARP
2012-09-01 19:54:56	East HARP
2012-09-01 20:56:52	East HARP
2012-09-01 23:01:56	East HARP
2012-09-02 08:40:09	East HARP
2012-09-02 15:09:11	East HARP
2012-09-02 16:38:50	East HARP
2012-09-02 18:52:04	East HARP
2012-09-02 19:54:54	East HARP
2012-09-02 20:44:46	East HARP
2012-09-03 01:54:39	East HARP
2012-09-03 03:55:24	East HARP
2012-09-03 08:08:13	East HARP
2012-09-03 08:46:00	East HARP
2012-09-03 09:56:58	East HARP
2012-09-03 11:31:28	East HARP
2012-09-03 12:43:36	East HARP
2012-09-03 13:49:08	East HARP
2012-09-03 14:46:14	East HARP
2012-09-03 16:28:35	East HARP
2012-09-03 17:57:18	East HARP
2012-09-03 19:00:18	East HARP
2012-09-03 22:33:13	East HARP
2012-09-04 01:36:05	East HARP
2012-09-04 02:30:36	East HARP
2012-09-04 14:26:00	East HARP
2012-09-04 15:03:59	East HARP
2012-09-04 17:34:51	East HARP
2012-09-04 20:57:06	East HARP
2012-09-04 22:00:03	East HARP
2012-09-04 22:48:23	East HARP
2012-09-05 07:52:50	East HARP
2012-09-05 19:24:56	East HARP
2012-09-06 01:26:10	East HARP
2012-09-06 02:13:26	East HARP
2012-09-06 03:21:17	East HARP
2012-09-06 04:36:50	East HARP
2012-09-06 08:01:33	East HARP
2012-09-06 11:00:38	East HARP
2012-09-06 12:08:35	East HARP
2012-09-06 13:30:46	East HARP
2012-09-06 19:14:00	East HARP
2012-09-06 20:15:30	East HARP
2012-09-07 03:43:31	East HARP
2012-09-07 10:37:02	East HARP
2012-09-07 11:44:58	East HARP
2012-09-07 12:54:58	East HARP
2012-09-08 07:46:12	East HARP
2012-09-08 09:14:46	East HARP
2012-09-08 14:52:17	East HARP
2012-09-08 15:54:59	East HARP
2012-09-09 02:24:46	East HARP
2012-09-09 04:04:34	East HARP
2012-09-09 04:06:11	East HARP
2012-09-09 04:06:11	East HARP
2012-09-09 04:07:47	East HARP
2012-09-09 04:12:36	East HARP
2012-09-09 04:19:02	East HARP
2012-09-09 04:20:38	East HARP
2012-09-09 04:27:03	East HARP
2012-09-09 04:28:40	East HARP
2012-09-09 04:31:53	East HARP
2012-09-09 04:36:40	East HARP
2012-09-09 04:38:15	East HARP
2012-09-09 04:43:04	East HARP
2012-09-09 04:44:40	East HARP
2012-09-09 04:46:18	East HARP
2012-09-09 04:49:28	East HARP
2012-09-09 04:51:05	East HARP
2012-09-09 04:52:41	East HARP
2012-09-09 04:54:17	East HARP
2012-09-09 04:55:55	East HARP
2012-09-09 04:57:30	East HARP
2012-09-09 05:00:43	East HARP
2012-09-09 05:02:18	East HARP
2012-09-09 05:07:04	East HARP
2012-09-09 05:08:40	East HARP
2012-09-09 05:10:16	East HARP
2012-09-09 05:13:32	East HARP
2012-09-09 05:15:05	East HARP
2012-09-09 05:16:41	East HARP
2012-09-09 05:18:17	East HARP
2012-09-09 05:19:53	East HARP
2012-09-09 05:21:29	East HARP
2012-09-09 05:24:42	East HARP
2012-09-09 05:26:19	East HARP
2012-09-09 05:27:56	East HARP
2012-09-09 05:31:08	East HARP
2012-09-09 05:32:45	East HARP
2012-09-09 05:34:22	East HARP
2012-09-09 05:37:35	East HARP
2012-09-09 05:39:11	East HARP
2012-09-09 05:40:47	East HARP
2012-09-09 05:42:24	East HARP
2012-09-09 05:44:00	East HARP
2012-09-09 05:45:37	East HARP
2012-09-09 05:48:49	East HARP
2012-09-09 05:50:25	East HARP
2012-09-09 05:52:01	East HARP
2012-09-09 05:55:13	East HARP
2012-09-09 05:56:49	East HARP
2012-09-09 05:58:26	East HARP
2012-09-09 06:00:02	East HARP
2012-09-09 06:01:39	East HARP
2012-09-09 06:03:16	East HARP
2012-09-09 06:04:53	East HARP
2012-09-09 06:06:29	East HARP
2012-09-09 06:08:06	East HARP
2012-09-09 06:09:42	East HARP
2012-09-09 06:12:56	East HARP
2012-09-09 06:14:33	East HARP
2012-09-09 06:24:11	East HARP
2012-09-09 06:25:47	East HARP
2012-09-09 06:27:24	East HARP
2012-09-09 06:30:36	East HARP
2012-09-09 06:32:13	East HARP
2012-09-09 06:33:50	East HARP
2012-09-09 06:37:02	East HARP
2012-09-09 06:38:39	East HARP
2012-09-09 06:40:15	East HARP
2012-09-09 06:43:28	East HARP
2012-09-09 06:45:04	East HARP
2012-09-09 06:46:44	East HARP
2012-09-09 06:48:17	East HARP
2012-09-09 06:49:54	East HARP
2012-09-09 06:51:30	East HARP
2012-09-09 06:54:43	East HARP
2012-09-09 06:56:19	East HARP
2012-09-09 06:57:56	East HARP
2012-09-09 07:01:08	East HARP
2012-09-09 07:02:45	East HARP
2012-09-09 07:04:21	East HARP
2012-09-09 07:07:34	East HARP
2012-09-09 07:09:10	East HARP
2012-09-09 07:10:47	East HARP
2012-09-09 07:12:23	East HARP
2012-09-09 07:14:00	East HARP
2012-09-09 07:15:36	East HARP
2012-09-09 07:18:50	East HARP
2012-09-09 07:20:27	East HARP
2012-09-09 07:22:04	East HARP
2012-09-09 07:25:18	East HARP
2012-09-09 07:26:55	East HARP
2012-09-09 07:28:32	East HARP
2012-09-09 07:30:09	East HARP
2012-09-09 07:31:45	East HARP
2012-09-09 07:33:22	East HARP
2012-09-09 07:36:37	East HARP
2012-09-09 07:38:15	East HARP
2012-09-09 07:39:52	East HARP
2012-09-09 07:43:04	East HARP
2012-09-09 07:44:43	East HARP
2012-09-09 07:46:18	East HARP
2012-09-09 07:49:32	East HARP
2012-09-09 07:51:10	East HARP
2012-09-09 07:52:47	East HARP
2012-09-09 07:54:24	East HARP
2012-09-09 07:56:01	East HARP
2012-09-09 07:57:38	East HARP
2012-09-09 08:00:52	East HARP
2012-09-09 08:04:06	East HARP
2012-09-09 08:07:20	East HARP
2012-09-09 08:08:57	East HARP
2012-09-09 08:10:33	East HARP
2012-09-09 08:12:10	East HARP
2012-09-09 08:13:47	East HARP
2012-09-09 08:15:25	East HARP
2012-09-09 08:18:39	East HARP
2012-09-09 08:20:15	East HARP
2012-09-09 08:21:53	East HARP
2012-09-09 08:25:07	East HARP
2012-09-09 08:26:44	East HARP
2012-09-09 08:28:22	East HARP
2012-09-09 08:31:33	East HARP
2012-09-09 08:33:13	East HARP
2012-09-09 08:34:49	East HARP
2012-09-09 08:36:26	East HARP
2012-09-09 08:38:02	East HARP
2012-09-09 08:39:39	East HARP
2012-09-21 00:36:03	East HARP
2012-09-21 00:36:14	East HARP
2012-09-21 00:36:27	East HARP
2012-09-21 00:36:39	East HARP
2012-09-21 00:36:52	East HARP
2012-09-21 00:37:11	East HARP
2012-09-21 00:37:16	East HARP
2012-09-21 00:38:18	East HARP
2012-09-21 00:38:42	East HARP
2012-09-21 00:38:55	East HARP
2012-09-21 00:39:00	East HARP
2012-09-21 00:39:11	East HARP
2012-09-21 00:39:45	East HARP
2012-09-21 00:39:56	East HARP
2012-09-21 00:40:09	East HARP
2012-09-21 00:40:22	East HARP
2012-09-21 00:42:12	East HARP
2012-09-21 00:42:23	East HARP
2012-09-21 00:42:37	East HARP
2012-09-21 00:42:49	East HARP
2012-09-21 00:43:13	East HARP
2012-09-21 00:43:26	East HARP
2012-09-21 00:43:37	East HARP
2012-09-21 00:43:49	East HARP
2012-09-21 00:44:03	East HARP
2012-09-21 00:44:15	East HARP
2012-09-21 00:44:33	East HARP
2012-09-21 00:44:40	East HARP
2012-09-21 00:45:04	East HARP
2012-09-21 00:45:41	East HARP
2012-09-21 00:46:18	East HARP
2012-09-21 00:46:30	East HARP
2012-09-21 00:46:43	East HARP
2012-09-21 00:46:55	East HARP
2012-09-21 00:48:09	East HARP
2012-09-21 00:48:21	East HARP
2012-09-21 00:48:33	East HARP
2012-09-21 00:48:46	East HARP
2012-09-21 00:48:58	East HARP
2012-09-21 00:49:10	East HARP
2012-09-21 00:49:22	East HARP
2012-09-21 00:49:35	East HARP
2012-09-21 00:49:47	East HARP
2012-09-21 00:49:59	East HARP
2012-09-21 00:50:12	East HARP
2012-09-21 00:50:24	East HARP
2012-09-21 00:50:36	East HARP
2012-09-21 00:50:49	East HARP
2012-09-21 00:51:01	East HARP
2012-09-21 00:51:13	East HARP
2012-09-21 00:51:26	East HARP
2012-09-21 00:51:38	East HARP
2012-09-21 00:51:50	East HARP
2012-09-21 00:52:03	East HARP
2012-09-21 00:52:15	East HARP
2012-09-21 00:52:27	East HARP
2012-09-21 00:52:39	East HARP
2012-09-21 00:52:52	East HARP
2014-01-20 21:40:06	East HARP
2014-01-20 21:40:19	East HARP
2014-01-20 21:40:31	East HARP
2014-01-20 21:40:43	East HARP
2014-01-20 21:40:55	East HARP
2014-01-20 21:41:08	East HARP
2014-01-20 21:41:20	East HARP
2014-01-20 21:41:32	East HARP
2014-01-20 21:41:45	East HARP
2014-01-20 21:41:57	East HARP
2014-01-20 21:42:10	East HARP
2014-01-20 21:42:22	East HARP
2014-01-20 21:42:34	East HARP
2014-01-20 21:42:46	East HARP
2014-01-20 21:42:59	East HARP
2014-01-20 21:43:11	East HARP
2014-01-20 21:43:24	East HARP
2014-01-20 21:43:36	East HARP
2014-01-20 21:43:48	East HARP
2014-01-20 21:44:01	East HARP
2014-01-20 21:44:13	East HARP
2014-01-20 21:44:25	East HARP
2014-01-20 21:44:38	East HARP
2014-01-20 21:44:50	East HARP
2014-01-20 21:47:05	East HARP
2014-01-20 21:47:18	East HARP
2014-01-20 21:47:30	East HARP
2014-01-20 21:47:42	East HARP
2014-01-20 21:47:55	East HARP
2014-01-20 21:48:07	East HARP
2014-01-20 21:48:19	East HARP
2014-01-20 21:48:32	East HARP
2014-01-20 21:48:44	East HARP
2014-01-20 21:48:56	East HARP
2014-01-20 21:49:08	East HARP
2014-01-20 21:49:21	East HARP
2014-01-20 21:49:33	East HARP
2014-01-20 21:49:45	East HARP
2014-01-20 21:49:57	East HARP
2014-01-20 21:50:09	East HARP
2014-01-20 21:50:22	East HARP
2014-01-20 21:50:34	East HARP
2014-01-20 21:50:47	East HARP
2014-01-20 21:50:59	East HARP
2014-01-20 21:51:11	East HARP
2014-01-20 21:51:24	East HARP
2014-01-20 21:51:36	East HARP
2014-01-20 21:51:48	East HARP
2014-01-20 21:54:03	East HARP
2014-01-20 21:54:15	East HARP
2014-01-20 21:54:28	East HARP
2014-01-20 21:54:40	East HARP
2014-01-20 21:54:52	East HARP
2014-01-20 21:55:04	East HARP
2014-01-20 21:55:17	East HARP
2014-01-20 21:55:29	East HARP
2014-01-20 21:55:41	East HARP
2014-01-20 21:55:54	East HARP
2014-01-20 21:56:06	East HARP
2014-01-20 21:56:18	East HARP
2014-01-20 21:56:31	East HARP
2014-01-20 21:56:43	East HARP
2014-01-20 21:56:55	East HARP
2014-01-20 21:57:08	East HARP
2014-01-20 21:57:20	East HARP
2014-01-20 21:57:32	East HARP
2014-01-20 21:57:44	East HARP
2014-01-20 21:57:57	East HARP
2014-01-20 21:58:09	East HARP
2014-01-20 21:58:22	East HARP
2014-01-20 21:58:34	East HARP
2014-01-20 21:58:46	East HARP
2014-01-20 21:58:58	East HARP
2014-01-20 22:01:01	East HARP
2014-01-20 22:01:14	East HARP
2014-01-20 22:01:26	East HARP
2014-01-20 22:01:38	East HARP
2014-01-20 22:01:50	East HARP
2014-01-20 22:02:03	East HARP
2014-01-20 22:02:15	East HARP
2014-01-20 22:02:27	East HARP
2014-01-20 22:02:39	East HARP
2014-01-20 22:02:52	East HARP
2014-01-20 22:03:04	East HARP
2014-01-20 22:03:16	East HARP
2014-01-20 22:03:29	East HARP
2014-01-20 22:03:41	East HARP
2014-01-20 22:03:53	East HARP
2014-01-20 22:04:05	East HARP
2014-01-20 22:04:18	East HARP
2014-01-20 22:04:30	East HARP
2014-01-20 22:04:42	East HARP
2014-01-20 22:04:54	East HARP
2014-01-20 22:05:07	East HARP
2014-01-20 22:05:19	East HARP
2014-01-20 22:05:31	East HARP
2014-01-20 22:05:44	East HARP
2014-01-20 22:05:56	East HARP
2014-01-20 22:08:11	East HARP
2014-01-20 22:08:23	East HARP
2014-01-20 22:08:36	East HARP
2014-01-20 22:08:48	East HARP
2014-01-20 22:09:00	East HARP
2014-01-20 22:09:12	East HARP
2014-01-20 22:09:25	East HARP
2014-01-20 22:09:37	East HARP
2014-01-20 22:09:49	East HARP
2014-01-20 22:10:02	East HARP
2014-01-20 22:10:14	East HARP
2014-01-20 22:10:26	East HARP
2014-01-20 22:10:39	East HARP
2014-01-20 22:10:51	East HARP
2014-01-20 22:11:03	East HARP
2014-01-20 22:11:16	East HARP
2014-01-20 22:11:28	East HARP
2014-01-20 22:11:40	East HARP
2014-01-20 22:11:52	East HARP
2014-01-20 22:12:05	East HARP
2014-01-20 22:12:17	East HARP
2014-01-20 22:12:29	East HARP
2014-01-20 22:12:41	East HARP
2014-01-20 22:12:54	East HARP
2014-01-20 22:15:09	East HARP
2014-01-20 22:15:21	East HARP
2014-01-20 22:15:33	East HARP
2014-01-20 22:15:45	East HARP
2014-01-20 22:15:57	East HARP
2014-01-20 22:16:10	East HARP
2014-01-20 22:16:22	East HARP
2014-01-20 22:16:34	East HARP
2014-01-20 22:16:47	East HARP
2014-01-20 22:16:59	East HARP
2014-01-20 22:17:12	East HARP
2014-01-20 22:17:24	East HARP
2014-01-20 22:17:36	East HARP
2014-01-20 22:17:49	East HARP
2014-01-20 22:18:01	East HARP
2014-01-20 22:18:13	East HARP
2014-01-20 22:18:25	East HARP
2014-01-20 22:18:38	East HARP
2014-01-20 22:18:50	East HARP
2014-01-20 22:19:03	East HARP
2014-01-20 22:19:15	East HARP
2014-01-20 22:19:27	East HARP
2014-01-20 22:19:40	East HARP
2014-01-20 22:19:52	East HARP
2014-01-20 22:22:07	East HARP
2014-01-20 22:22:19	East HARP
2014-01-20 22:22:31	East HARP
2014-01-20 22:22:44	East HARP
2014-01-20 22:22:56	East HARP
2014-01-20 22:23:08	East HARP
2014-01-20 22:23:21	East HARP
2014-01-20 22:23:33	East HARP
2014-01-20 22:23:45	East HARP
2014-01-20 22:23:58	East HARP
2014-01-20 22:24:10	East HARP
2014-01-20 22:24:22	East HARP
2014-01-20 22:24:35	East HARP
2014-01-20 22:24:47	East HARP
2014-01-20 22:24:59	East HARP
2014-01-20 22:25:11	East HARP
2014-01-20 22:25:24	East HARP
2014-01-20 22:25:36	East HARP
2014-01-20 22:25:49	East HARP
2014-01-20 22:26:01	East HARP
2014-01-20 22:26:13	East HARP
2014-01-20 22:26:26	East HARP
2014-01-20 22:26:38	East HARP
2014-01-20 22:26:50	East HARP
2014-01-20 22:29:07	East HARP
2014-01-20 22:29:19	East HARP
2014-09-08 21:30:15	East HARP
2014-09-08 21:31:53	East HARP
2014-09-08 21:35:13	East HARP
2014-09-08 21:59:56	East HARP
2014-09-08 22:03:13	East HARP
2014-09-08 22:04:53	East HARP
2014-09-08 23:30:58	East HARP
2014-09-08 23:34:11	East HARP
2014-09-08 23:35:48	East HARP
2014-09-09 00:03:19	East HARP
2014-09-09 00:04:54	East HARP
2014-09-09 00:04:55	East HARP
2014-09-09 00:04:59	East HARP
2014-09-09 00:32:35	East HARP
2014-09-09 00:32:34	East HARP
2014-09-09 00:34:13	East HARP
2014-09-09 00:37:28	East HARP
2014-09-09 02:30:44	East HARP
2014-09-09 02:32:23	East HARP
2014-09-09 02:37:21	East HARP
2014-09-09 03:05:32	East HARP
2014-09-09 03:32:08	East HARP
2014-09-09 03:33:47	East HARP
2014-09-09 03:35:26	East HARP
2014-09-09 04:00:22	East HARP
2014-09-09 04:02:01	East HARP
2014-09-09 04:03:41	East HARP
2014-09-09 04:07:00	East HARP
2014-09-09 04:00:22	East HARP
2014-09-09 04:02:01	East HARP
2014-09-09 04:03:41	East HARP
2014-09-09 04:07:00	East HARP
2014-09-09 04:07:00	East HARP
2014-09-09 04:30:14	East HARP
2014-09-09 04:31:55	East HARP
2014-09-09 04:35:12	East HARP
2014-09-09 05:00:11	East HARP
2014-09-09 05:03:29	East HARP
2014-09-09 05:05:10	East HARP
2014-09-09 05:28:43	East HARP
2014-09-09 05:38:27	East HARP
2014-09-09 06:01:06	East HARP
2014-09-09 06:02:43	East HARP
2014-09-09 06:06:00	East HARP
2014-09-09 06:30:10	East HARP
2014-09-09 06:31:26	East HARP
2014-09-09 06:31:48	East HARP
2014-09-09 06:34:44	East HARP
2014-09-09 06:35:00	East HARP
2014-09-09 06:36:41	East HARP
2014-09-09 06:59:20	East HARP
2014-09-09 06:59:29	East HARP
2014-09-09 07:02:35	East HARP
2014-09-09 07:02:46	East HARP
2014-09-09 07:05:53	East HARP
2014-09-09 07:06:04	East HARP
2014-09-09 07:09:07	East HARP
2014-09-09 07:09:22	East HARP
2014-09-09 07:30:06	East HARP
2014-09-09 07:30:55	East HARP
2014-09-09 07:31:45	East HARP
2014-09-09 07:32:35	East HARP
2014-09-09 07:33:24	East HARP
2014-09-09 07:34:13	East HARP
2014-09-09 07:37:32	East HARP
2014-09-09 08:58:13	East HARP
2014-09-09 09:01:30	East HARP
2014-09-09 09:02:19	East HARP
2014-09-09 09:03:08	East HARP
2014-09-09 09:03:58	East HARP
2014-09-09 09:04:47	East HARP
2014-09-09 09:05:37	East HARP
2014-09-09 09:30:12	East HARP
2014-09-09 09:31:01	East HARP
2014-09-09 09:31:50	East HARP
2014-09-09 09:32:40	East HARP
2014-09-09 09:33:28	East HARP
2014-09-09 09:36:45	East HARP
2014-09-09 10:35:18	East HARP
2014-09-09 10:36:08	East HARP
2014-09-09 10:39:24	East HARP
2014-09-09 11:00:19	East HARP
2014-09-09 11:01:53	East HARP
2014-09-09 11:03:29	East HARP
2014-09-09 11:30:16	East HARP
2014-09-09 11:30:56	East HARP
2014-09-09 11:31:57	East HARP
2014-09-09 11:32:32	East HARP
2014-09-09 11:35:10	East HARP
2014-09-09 11:35:46	East HARP
2014-09-09 11:36:48	East HARP
2014-09-09 11:59:57	East HARP
2014-09-09 12:03:11	East HARP
2014-09-09 12:04:19	East HARP
2014-09-09 12:04:48	East HARP
2014-09-09 12:05:56	East HARP
2014-09-09 12:06:26	East HARP
2014-09-09 12:31:48	East HARP
2014-09-09 12:32:19	East HARP
2014-09-09 12:33:25	East HARP
2014-09-09 12:33:56	East HARP
2014-09-09 12:35:02	East HARP
2014-09-09 12:35:32	East HARP
2014-09-09 13:00:49	East HARP
2014-09-09 13:02:26	East HARP
2014-09-09 13:29:58	East HARP
2014-09-09 13:30:27	East HARP
2014-09-09 13:31:35	East HARP
2014-09-09 13:34:49	East HARP
2014-09-09 13:35:17	East HARP
2014-09-09 13:36:26	East HARP
2014-09-09 13:36:52	East HARP
2014-09-09 13:59:29	East HARP
2014-09-09 14:02:24	East HARP
2014-09-09 14:02:46	East HARP
2014-09-09 14:04:01	East HARP
2014-09-09 14:04:23	East HARP
2014-09-09 14:30:14	East HARP
2014-09-09 14:31:32	East HARP
2014-09-09 14:31:50	East HARP
2014-09-09 14:33:09	East HARP
2014-09-09 14:33:26	East HARP
2014-09-09 14:34:46	East HARP
2014-09-09 15:00:47	East HARP
2014-09-09 15:02:23	East HARP
2014-09-09 15:05:36	East HARP
2014-09-09 15:33:02	East HARP
2014-09-09 15:34:40	East HARP
2014-09-09 15:36:17	East HARP
2014-09-09 16:01:08	East HARP
2014-09-09 16:02:09	East HARP
2014-09-09 16:02:44	East HARP
2014-09-09 16:03:46	East HARP
2014-09-09 16:04:21	East HARP
2014-09-09 16:05:23	East HARP
2014-09-09 16:30:14	East HARP
2014-09-09 16:31:19	East HARP
2014-09-09 16:31:51	East HARP
2014-09-09 16:32:56	East HARP
2014-09-09 16:33:28	East HARP
2014-09-09 16:36:10	East HARP
2014-09-09 16:36:43	East HARP
2014-09-09 17:00:29	East HARP
2014-09-09 17:01:03	East HARP
2014-09-09 17:04:18	East HARP
2014-09-09 17:05:21	East HARP
2014-09-09 17:05:56	East HARP
2014-09-09 17:29:40	East HARP
2014-09-09 17:32:54	East HARP
2014-09-09 17:33:33	East HARP
2014-09-09 17:34:32	East HARP
2014-09-09 17:35:10	East HARP
2014-09-09 17:36:09	East HARP
2014-09-09 17:36:48	East HARP
2014-09-09 17:39:23	East HARP
2014-09-09 18:00:27	East HARP
2014-09-09 18:02:04	East HARP
2014-09-09 18:03:41	East HARP
2014-09-09 18:03:56	East HARP
2014-09-09 18:04:26	East HARP
2014-09-09 18:04:59	East HARP
2014-09-09 18:07:19	East HARP
2014-09-09 18:04:26	East HARP
2014-09-09 18:31:14	East HARP
2014-09-09 18:32:52	East HARP
2014-09-09 18:36:06	East HARP
2014-09-09 19:00:28	East HARP
2014-09-09 19:03:43	East HARP
2014-09-09 19:05:20	East HARP
2014-09-09 21:31:13	East HARP
2014-09-09 21:32:50	East HARP
2014-09-09 21:34:28	East HARP
2014-09-09 21:37:42	East HARP
2014-09-09 22:00:22	East HARP
2014-09-09 22:01:59	East HARP
2014-09-09 22:05:13	East HARP
2014-09-09 22:06:18	East HARP
2014-09-09 22:34:22	East HARP
2014-09-09 22:35:59	East HARP
2014-09-09 23:01:53	East HARP
2014-09-09 23:03:30	East HARP
2014-09-09 23:05:08	East HARP
2014-09-09 23:31:02	East HARP
2014-09-09 23:32:39	East HARP
2014-09-10 00:00:09	East HARP
2014-09-10 00:01:46	East HARP
2014-09-10 00:05:00	East HARP
2014-09-10 00:06:37	East HARP
2014-09-10 00:39:05	East HARP
2014-09-10 01:00:08	East HARP
2014-09-10 01:01:46	East HARP
2014-09-10 01:03:23	East HARP
2014-09-10 01:30:56	East HARP
2014-09-10 01:32:33	East HARP
2014-09-10 01:35:47	East HARP
2014-09-10 02:00:02	East HARP
2014-09-10 02:03:16	East HARP
2014-09-10 02:04:53	East HARP
2014-09-10 02:32:22	East HARP
2014-09-10 02:33:59	East HARP
2014-09-10 02:35:36	East HARP
2014-09-10 03:01:28	East HARP
2014-09-10 03:03:05	East HARP
2014-09-10 05:58:29	East HARP
2014-09-10 06:01:43	East HARP
2014-09-10 06:04:58	East HARP
2014-09-10 06:30:53	East HARP
2014-09-10 06:32:30	East HARP
2014-09-10 07:00:04	East HARP
2014-09-10 07:01:41	East HARP
2014-09-10 07:06:33	East HARP
2014-09-10 07:29:15	East HARP
2014-09-10 07:32:29	East HARP
2014-09-10 07:35:44	East HARP
2014-09-10 07:39:00	East HARP
2014-09-10 08:00:03	East HARP
2014-09-10 08:01:40	East HARP
2014-09-10 08:03:17	East HARP
2014-09-10 08:04:55	East HARP
2014-09-10 08:30:51	East HARP
2014-09-10 08:32:28	East HARP
2014-09-10 08:35:43	East HARP
2014-09-10 17:06:57	East HARP
[truncated: 846 more rows]
