# Supplementary material for: Co-occurrence of beaked whale strandings and naval sonar in the Mariana Islands, Western Pacific
Source: PubMed Central journal article supplement (PMC7062028; doi:10.1098/rspb.2020.0070), 2020-02-19
Supplement: rspb20200070supp1.pdf [file rspb20200070supp1.pdf]

**Supplementary Table 1. Major International Navy Training Operations in the Mariana Islands Range Complex from 2003 – 2019.**

|    | <b>Exercise Name</b>          | <b>Dates</b>             | <b>Platforms</b>        | <b>Anti-Submarine Operation</b> | <b>Citation</b>                                                                                                                                                                                                                                                                                                                                                                                                                                                                                                                                                                                                                           |
|----|-------------------------------|--------------------------|-------------------------|---------------------------------|-------------------------------------------------------------------------------------------------------------------------------------------------------------------------------------------------------------------------------------------------------------------------------------------------------------------------------------------------------------------------------------------------------------------------------------------------------------------------------------------------------------------------------------------------------------------------------------------------------------------------------------------|
| 1  | Tandem Thrust 2003 *          | April 14 – May 5, 2003   | Surface ship & aviation | Yes                             | <a href="https://www.navy.mil/submit/display.asp?story_id=7367">https://www.navy.mil/submit/display.asp?story_id=7367</a> ;<br><a href="https://www.navy.mil/submit/display.asp?story_id=7005">https://www.navy.mil/submit/display.asp?story_id=7005</a> ;<br><a href="https://www.globalsecurity.org/military/ops/tandem-thrust.htm">https://www.globalsecurity.org/military/ops/tandem-thrust.htm</a>                                                                                                                                                                                                                                   |
| 2  | Valiant Shield 2006           | June 19 – 23, 2006       | Surface ship & aviation | Yes                             | <a href="https://www.navy.mil/submit/display.asp?story_id=24337">https://www.navy.mil/submit/display.asp?story_id=24337</a> ;<br><a href="https://www.navy.mil/submit/display.asp?story_id=24249">https://www.navy.mil/submit/display.asp?story_id=24249</a>                                                                                                                                                                                                                                                                                                                                                                              |
| 3  | Valiant Shield 2007           | August 7 – 14, 2007      | Surface ship & aviation | Yes                             | <a href="https://www.navy.mil/submit/display.asp?story_id=31261">https://www.navy.mil/submit/display.asp?story_id=31261</a> ;<br><a href="https://www.navy.mil/submit/display.asp?story_id=31033">https://www.navy.mil/submit/display.asp?story_id=31033</a>                                                                                                                                                                                                                                                                                                                                                                              |
| 4  | Multi-Sail 2010               | April 7 – 16, 2010       | Surface ship            | Yes                             | <a href="https://www.navy.mil/submit/display.asp?story_id=52710">https://www.navy.mil/submit/display.asp?story_id=52710</a>                                                                                                                                                                                                                                                                                                                                                                                                                                                                                                               |
| 5  | Valiant Shield 2010           | September 2 – 21, 2010   | Surface ship & aviation | Yes                             | <a href="https://www.cpf.navy.mil/news.aspx/000053">https://www.cpf.navy.mil/news.aspx/000053</a> ;<br><a href="https://www.navy.mil/submit/display.asp?story_id=56123">https://www.navy.mil/submit/display.asp?story_id=56123</a>                                                                                                                                                                                                                                                                                                                                                                                                        |
| 6  | US Navy unit level exercise** | August 21, 2011          | unknown                 | Yes                             | Pers. Comm U.S. Pacific Fleet N465                                                                                                                                                                                                                                                                                                                                                                                                                                                                                                                                                                                                        |
| 7  | Valiant Shield 2012           | September 11 – 19, 2012  | Surface ship & aviation | Yes                             | <a href="https://www.public.navy.mil/surfor/Pages/ValiantShield2012Ends.aspx">https://www.public.navy.mil/surfor/Pages/ValiantShield2012Ends.aspx</a>                                                                                                                                                                                                                                                                                                                                                                                                                                                                                     |
| 8  | Multi-Sail 2013 *             | March 29 – April 5, 2013 | Surface ship & aviation | Yes                             | <a href="https://www.public.navy.mil/surfor/ddg82/Pages/StandardMissileLaunch.aspx">https://www.public.navy.mil/surfor/ddg82/Pages/StandardMissileLaunch.aspx</a> ; <a href="https://navylive.dodlive.mil/2013/04/15/your-navy-operating-forward-pacific-ocean-north-arabian-sea-5th-fleet/multi-sail-13-2/">https://navylive.dodlive.mil/2013/04/15/your-navy-operating-forward-pacific-ocean-north-arabian-sea-5th-fleet/multi-sail-13-2/</a>                                                                                                                                                                                           |
| 9  | Multi-Sail 2014               | March, 21 – 26, 2014     | Surface ship & aviation | Yes                             | <a href="https://www.navy.mil/submit/display.asp?story_id=79832">https://www.navy.mil/submit/display.asp?story_id=79832</a> ;<br><a href="https://www.public.navy.mil/surfor/cds-15/Pages/Multi-Sail-2014.aspx">https://www.public.navy.mil/surfor/cds-15/Pages/Multi-Sail-2014.aspx</a>                                                                                                                                                                                                                                                                                                                                                  |
| 10 | GUAMEX 2014                   | August 9 – 15, 2014      | Surface ship & aviation | Yes                             | <a href="https://www.navy.mil/submit/display.asp?story_id=82619">https://www.navy.mil/submit/display.asp?story_id=82619</a> ;<br><a href="https://navaltoday.com/2014/08/12/guamex-focuses-on-anti-submarine-operations/">https://navaltoday.com/2014/08/12/guamex-focuses-on-anti-submarine-operations/</a>                                                                                                                                                                                                                                                                                                                              |
| 11 | Valiant Shield 2014           | September 15 – 23, 2014  | Surface ship & aviation | Yes                             | <a href="https://www.public.navy.mil/surfor/Pages/USPacificCommandForcesComeTogetherforValiantShield2014.aspx">https://www.public.navy.mil/surfor/Pages/USPacificCommandForcesComeTogetherforValiantShield2014.aspx</a> ;<br><a href="https://www.public.navy.mil/surfor/cds-15/Pages/ValiantShield2014comestosuccessfulend.aspx">https://www.public.navy.mil/surfor/cds-15/Pages/ValiantShield2014comestosuccessfulend.aspx</a> ;<br><a href="https://www.public.navy.mil/surfor/ddg89/Pages/ValiantShieldExerciseKicksOffinPacific.aspx">https://www.public.navy.mil/surfor/ddg89/Pages/ValiantShieldExerciseKicksOffinPacific.aspx</a> |
| 12 | Multi-Sail 2015               | March 20 – 30, 2015      | Surface ship & aviation | Yes                             | <a href="https://www.public.navy.mil/surfor/cds-15/Pages/desron-15-jmsdf-flex-their-combat-capability-during-multi-sail-2015.aspx">https://www.public.navy.mil/surfor/cds-15/Pages/desron-15-jmsdf-flex-their-combat-capability-during-multi-sail-2015.aspx</a>                                                                                                                                                                                                                                                                                                                                                                           |
| 13 | GUAMEX 2016                   | January 22 – 31, 2016    | Surface ship            | Yes                             | <a href="https://www.public.navy.mil/surfor/cds-15/Pages/US,-Japanese-Ships-Start-Tactical-Exercise-Near-Guam-.aspx">https://www.public.navy.mil/surfor/cds-15/Pages/US,-Japanese-Ships-Start-Tactical-Exercise-Near-Guam-.aspx</a>                                                                                                                                                                                                                                                                                                                                                                                                       |

|    |                      |                               |                         |     |                                                                                                                                                                                                                                                                                     |
|----|----------------------|-------------------------------|-------------------------|-----|-------------------------------------------------------------------------------------------------------------------------------------------------------------------------------------------------------------------------------------------------------------------------------------|
| 14 | Multi-Sail 2016      | March 6 – 11, 2016            | Surface ship & aviation | Yes | <a href="https://www.public.navy.mil/surfor/cds-15/Pages/US-Navy,-JMSDF-Complete-Annual-Multi-Sail-Exercise-.aspx">https://www.public.navy.mil/surfor/cds-15/Pages/US-Navy,-JMSDF-Complete-Annual-Multi-Sail-Exercise-.aspx</a>                                                     |
| 15 | Valiant Shield 2016  | September 12 – 23, 2016       | Surface ship & aviation | Yes | <a href="https://www.public.navy.mil/surfor/Pages/U.S.-Pacific-Command-forces-to-come-together-for-exercise-Valiant-Shield.aspx">https://www.public.navy.mil/surfor/Pages/U.S.-Pacific-Command-forces-to-come-together-for-exercise-Valiant-Shield.aspx</a>                         |
| 16 | Multi-Sail 2017      | March 6 – 10, 2017            | Surface ship            | Yes | <a href="https://www.public.navy.mil/surfor/cds-15/Pages/U.S.-Navy-JMSDF-complete-annual-MultiSail-exercise-.aspx">https://www.public.navy.mil/surfor/cds-15/Pages/U.S.-Navy-JMSDF-complete-annual-MultiSail-exercise-.aspx</a>                                                     |
| 17 | GUAMEX 2017          | July 31 – August 12, 2017     | Surface ship & aviation | Yes | <a href="https://www.navy.mil/submit/display.asp?story_id=101709">https://www.navy.mil/submit/display.asp?story_id=101709</a>                                                                                                                                                       |
| 18 | Pacific Griffin 2017 | August 19 – September 2, 2017 | Surface ship            | Yes | <a href="https://www.public.navy.mil/surfor/lcs4/Pages/US-Singapore-navies-enhance-maritime-partnership-with-training-in-Guam-.aspx">https://www.public.navy.mil/surfor/lcs4/Pages/US-Singapore-navies-enhance-maritime-partnership-with-training-in-Guam-.aspx</a>                 |
| 19 | Multi-Sail 2018      | March 8 – 14, 2018            | Surface ship            | Yes | <a href="https://www.public.navy.mil/surfor/cds-15/Pages/US-Navy-JMSDF-Participate-in-MultiSail-2018.aspx">https://www.public.navy.mil/surfor/cds-15/Pages/US-Navy-JMSDF-Participate-in-MultiSail-2018.aspx</a>                                                                     |
| 20 | Malabar 2018         | June 7 – 10, 2018             | Surface ship            | Yes | <a href="https://www.public.navy.mil/surfor/ccsg5/Pages/US-Indian-and-Japanese-Maritime-Forces-to-Participate-in-Exercise-Malabar-2018.aspx">https://www.public.navy.mil/surfor/ccsg5/Pages/US-Indian-and-Japanese-Maritime-Forces-to-Participate-in-Exercise-Malabar-2018.aspx</a> |
| 21 | Valiant Shield 2018  | September 16 – 26, 2018       | Surface ship & aviation | Yes | <a href="https://www.public.navy.mil/surfor/ccsg5/Pages/Joint-US-Forces-Team-for-Exercise-Valiant-Shield-2018.aspx">https://www.public.navy.mil/surfor/ccsg5/Pages/Joint-US-Forces-Team-for-Exercise-Valiant-Shield-2018.aspx</a>                                                   |
| 22 | Exercise Sea Dragon  | January 14 – 26, 2019         | Aviation                | Yes | <a href="https://www.c7f.navy.mil/Media/News/Display/Article/1730836/us-australia-set-to-kick-off-2019-exercise-sea-dragon/">https://www.c7f.navy.mil/Media/News/Display/Article/1730836/us-australia-set-to-kick-off-2019-exercise-sea-dragon/</a>                                 |

**NOTE:**

\*Dates approximated from U.S. Navy public website

\*\* Not a major international naval operation
