# Supplementary material for: Co-occurrence of beaked whale strandings and naval sonar in the Mariana Islands, Western Pacific
Source: PubMed Central journal article supplement (PMC7062028; doi:10.1098/rspb.2020.0070), 2020-02-19
Supplement: rspb20200070supp2.pdf [file rspb20200070supp2.pdf]

**Supplementary Table 2. Probability of n stranding events randomly occurring during or within 6 days after documented naval events from June 2006 through January 2019**

| <b>Number of stranding events associated with naval event</b> | <b>Probability</b> |
|---------------------------------------------------------------|--------------------|
| <b>0</b>                                                      | <b>100%</b>        |
| <b>1</b>                                                      | <b>40%</b>         |
| <b>2</b>                                                      | <b>8%</b>          |
| <b>3</b>                                                      | <b>1%</b>          |
| <b>4</b>                                                      | <b>0.1%</b>        |
| <b>5</b>                                                      | <b>0%</b>          |
