# Supplementary material for: Co-occurrence of beaked whale strandings and naval sonar in the Mariana Islands, Western Pacific
Source: PubMed Central journal article supplement (PMC7062028; doi:10.1098/rspb.2020.0070), 2020-02-19
Supplement: rspb20200070supp4.pdf [file rspb20200070supp4.pdf]

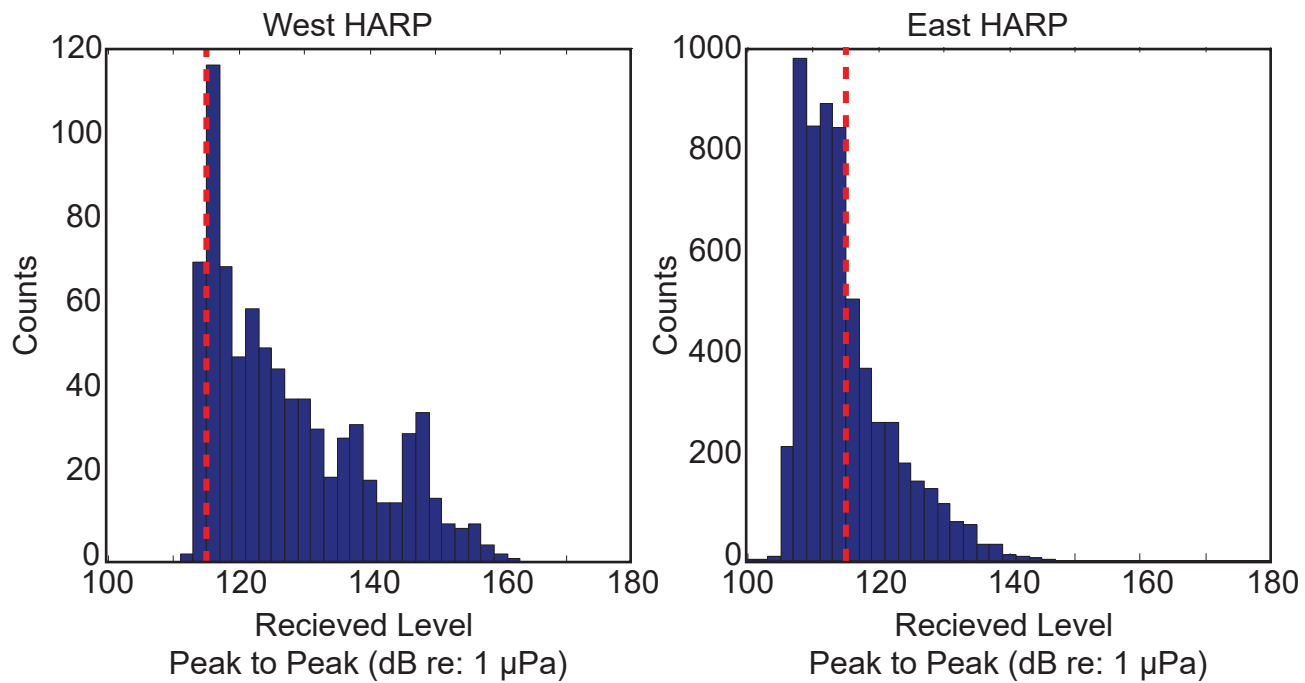

**Supplemental Figure S2.** Histogram of peak-to-peak received levels of MFAS packets detected by a human analyst at West (left) and East (right) HARPS. A threshold was set at 115 dB re: 1  $\mu$ Pa for reporting acoustic characteristics (duration, RL, SEL) in Table 3.
